# Supplementary material for: Growth Dynamics of the Threatened Caribbean Staghorn Coral Acropora cervicornis: Influence of Host Genotype, Symbiont Identity, Colony Size, and Environmental Setting
Source: PLoS One. 2014 Sep 30;9(9):e107253. doi: 10.1371/journal.pone.0107253 (PMC4182308; doi:10.1371/journal.pone.0107253)
Supplement: Data S1 — Size and number of branches of the staghorn corals included in this study. (XLS) [file pone.0107253.s002.xls]

## Sheet: Sheet1
Country	TYPE	TLE1 (cm)	TLE12 (cm)	N Branches 1	N Branches 12 mo
DR	NURSERY	12.7	40
DR	NURSERY	14	52
DR	NURSERY	10.6	49.5
DR	NURSERY	14.3	62.5
DR	NURSERY	16	79
DR	NURSERY	18	82.5
DR	NURSERY	14.9	83.5
DR	NURSERY	9	85
DR	NURSERY	17	107.5
DR	NURSERY	21.7	117
DR	NURSERY	30.4	133
DR	NURSERY	21.6	136
DR	NURSERY	17.2	137
DR	NURSERY	14	179.5
DR	NURSERY	25	207
DR	NURSERY	23	214.5
MIAMI	NURSERY	7.5	91.6364	2	18
MIAMI	NURSERY	8.2	132	2	26
MIAMI	NURSERY	7.6	19.6364	3	4
MIAMI	NURSERY	6.2	55.6364	2	12
MIAMI	NURSERY	5	55.6364	2	13
MIAMI	NURSERY	6.4	75.2727	1	19
MIAMI	NURSERY	6.2	36	2	10
MIAMI	NURSERY	4.5	69.2727	1	21
MIAMI	NURSERY	4.3	26.1818	2	8
MIAMI	NURSERY	3.5	14.7273	2	5
MIAMI	NURSERY	5.3	34.9091	1	12
MIAMI	NURSERY	2.5	16.3636	1	6
MIAMI	NURSERY	1.4	10.9091	1	5
MIAMI	NURSERY	1.3	2.18182	1	1
MIAMI	NURSERY	2.3	9.81818	1	5
MIAMI	NURSERY	6.6	*	2	*
MIAMI	NURSERY	5.2	*	1	*
MIAMI	NURSERY	5.5	1.09091	1	*
MIAMI	OUTPLANT	16	195.789	3	23
MIAMI	OUTPLANT	6.3	34.7368	2	5
MIAMI	OUTPLANT	5.4	34.7368	1	5
MIAMI	OUTPLANT	7	88.4211	1	13
MIAMI	OUTPLANT	6.5	157.895	1	24
MIAMI	OUTPLANT	3.15	12.6316	1	2
MIAMI	OUTPLANT	7	135.789	1	22
MIAMI	OUTPLANT	8	53.6842	2	9
MIAMI	OUTPLANT	5	176.842	1	30
MIAMI	OUTPLANT	13	88.4211	4	15
MIAMI	OUTPLANT	8	132.632	2	23
MIAMI	OUTPLANT	6.3	78.9474	1	14
MIAMI	OUTPLANT	5	116.842	1	21
MIAMI	OUTPLANT	8	82.1053	2	15
MIAMI	OUTPLANT	9	15.7895	1	3
MIAMI	OUTPLANT	13.95	63.1579	3	13
MIAMI	OUTPLANT	5.85	37.8947	1	8
MIAMI	OUTPLANT	3.6	28.4211	1	6
MIAMI	OUTPLANT	10	85.2632	4	19
MIAMI	OUTPLANT	13	75.7895	4	17
MIAMI	OUTPLANT	5.4	22.1053	1	5
MIAMI	OUTPLANT	6.75	47.3684	1	11
MIAMI	OUTPLANT	14	41.0526	2	10
MIAMI	OUTPLANT	6.5	28.4211	1	7
MIAMI	OUTPLANT	4.95	18.9474	1	5
MIAMI	OUTPLANT	11	44.2105	2	14
MIAMI	OUTPLANT	16	34.7368	5	11
MIAMI	OUTPLANT	7.2	15.7895	2	5
MIAMI	OUTPLANT	11	44.2105	2	14
MIAMI	OUTPLANT	8	37.8947	1	12
MIAMI	OUTPLANT	4	9.47368	1	3
MIAMI	OUTPLANT	11	28.4211	3	10
MIAMI	OUTPLANT	15	53.6842	2	19
MIAMI	OUTPLANT	12	25.2632	2	9
MIAMI	OUTPLANT	7	41.0526	1	15
MIAMI	OUTPLANT	6	34.7368	1	13
MIAMI	OUTPLANT	10	47.3684	2	18
MIAMI	OUTPLANT	3.6	12.6316	1	5
MIAMI	OUTPLANT	5	22.1053	1	9
MIAMI	OUTPLANT	6.75	9.47368	1	4
MIAMI	OUTPLANT	3.6	15.7895	1	7
MIAMI	OUTPLANT	5	25.2632	1	12
MIAMI	OUTPLANT	10	*	1	*
MIAMI	NURSERY	6.7	46.9091	2	5
MIAMI	NURSERY	5.3	31.6364	2	4
MIAMI	NURSERY	4.6	37.6364	1	5
MIAMI	NURSERY	4.5	27.2727	1	4
MIAMI	NURSERY	6.7	33.2727	2	6
MIAMI	NURSERY	1.6	25.0909	1	5
MIAMI	NURSERY	3.4	9.27273	1	2
MIAMI	NURSERY	5.1	21.2727	2	5
MIAMI	NURSERY	3.3	16.3636	1	4
MIAMI	NURSERY	2.8	6	1	2
MIAMI	NURSERY	3.3	*	1	*
MIAMI	NURSERY	6	47.3143	2	7
MIAMI	NURSERY	3	30.5143	1	5
MIAMI	NURSERY	3	41.16	1	7
MIAMI	NURSERY	2.5	45.6	1	8
MIAMI	NURSERY	1.5	38.76	1	7
MIAMI	NURSERY	4.6	26.95	1	5
MIAMI	NURSERY	4.5	47.9143	1	9
MIAMI	NURSERY	7	31.5429	3	6
MIAMI	NURSERY	1	28.2	1	6
MIAMI	NURSERY	3	31.2	1	7
MIAMI	NURSERY	3	39.36	1	9
MIAMI	NURSERY	4.2	24.2	1	6
MIAMI	NURSERY	3.7	3.85	1	1
MIAMI	NURSERY	2.5	22.5429	1	6
MIAMI	NURSERY	2	24.1714	1	7
MIAMI	NURSERY	5	2.75	1	1
MIAMI	NURSERY	3	9.25714	1	4
MIAMI	NURSERY	5.5	1.65	1	1
MIAMI	NURSERY	3	*	1	5
MIAMI	NURSERY	4.4	*	1	1
MIAMI	NURSERY	3.6	*	1	*
MIAMI	NURSERY	4.3	*	1
MIAMI	NURSERY	8.6	92.7273	1	8
MIAMI	NURSERY	4.4	28.9091	1	3
MIAMI	NURSERY	4.4	36.5455	1	4
MIAMI	NURSERY	8.9	70.9091	2	9
MIAMI	NURSERY	3	28.9091	1	4
MIAMI	NURSERY	2.7	7.09091	1	1
MIAMI	NURSERY	3.2	19.6364	1	3
MIAMI	NURSERY	6.6	13.0909	1	2
MIAMI	NURSERY	5.7	51.8182	1	9
MIAMI	NURSERY	1.5	6.54545	1	2
MIAMI	NURSERY	1.6	4.90909	1	2
MIAMI	NURSERY	3.4	*	1	*
MIAMI	NURSERY	3.5	*	1	*
MIAMI	OUTPLANT	9.5	29	2	3
MIAMI	OUTPLANT	5.3	12	1	2
MIAMI	OUTPLANT	8.5	8.5	2	3
MIAMI	OUTPLANT	8.1	56.8421	1	6
MIAMI	OUTPLANT	11	53.6842	2	6
MIAMI	OUTPLANT	6.3	75.7895	1	9
MIAMI	OUTPLANT	6.3	47.3684	1	6
MIAMI	OUTPLANT	8	30.9474	1	4
MIAMI	OUTPLANT	9	82.1053	1	11
MIAMI	OUTPLANT	7	82.1053	2	11
MIAMI	OUTPLANT	10	148.421	4	20
MIAMI	OUTPLANT	7	66.3158	1	9
MIAMI	OUTPLANT	18	107.368	4	15
MIAMI	OUTPLANT	4	47.3684	1	7
MIAMI	OUTPLANT	6.3	53.6842	1	8
MIAMI	OUTPLANT	7	66.3158	1	10
MIAMI	OUTPLANT	9	72.6316	1	11
MIAMI	OUTPLANT	6.3	123.158	1	19
MIAMI	OUTPLANT	4.05	126.316	1	20
MIAMI	OUTPLANT	8	50.5263	1	8
MIAMI	OUTPLANT	6.3	18.9474	1	3
MIAMI	OUTPLANT	12.6	56.8421	2	9
MIAMI	OUTPLANT	5.85	18.9474	1	3
MIAMI	OUTPLANT	7	72.6316	1	12
MIAMI	OUTPLANT	8.1	44.2105	1	8
MIAMI	OUTPLANT	3.6	22.1053	1	4
MIAMI	OUTPLANT	12.6	60	2	11
MIAMI	OUTPLANT	7.2	37.8947	1	7
MIAMI	OUTPLANT	4.5	53.6842	1	10
MIAMI	OUTPLANT	8	42.9474	2	8
MIAMI	OUTPLANT	9	69.4737	1	13
MIAMI	OUTPLANT	4.5	15.7895	1	3
MIAMI	OUTPLANT	6.3	47.3684	1	9
MIAMI	OUTPLANT	7	41.0526	1	8
MIAMI	OUTPLANT	9.9	41.0526	3	8
MIAMI	OUTPLANT	5.4	66.3158	1	13
MIAMI	OUTPLANT	5.4	50.5263	1	10
MIAMI	OUTPLANT	7.2	53.6842	1	11
MIAMI	OUTPLANT	12.6	72.6316	4	15
MIAMI	OUTPLANT	11.7	82.1053	2	17
MIAMI	OUTPLANT	6.3	28.4211	1	6
MIAMI	OUTPLANT	5.4	47.3684	1	10
MIAMI	OUTPLANT	10.8	28.4211	3	6
MIAMI	OUTPLANT	6.3	37.8947	1	8
MIAMI	OUTPLANT	9	41.0526	2	9
MIAMI	OUTPLANT	7	27.1579	1	6
MIAMI	OUTPLANT	8.55	22.1053	1	5
MIAMI	OUTPLANT	3.6	12.6316	1	3
MIAMI	OUTPLANT	20.7	60	4	15
MIAMI	OUTPLANT	17.1	31.5789	4	8
MIAMI	OUTPLANT	5.85	31.5789	1	8
MIAMI	OUTPLANT	7.2	7.57895	1	2
MIAMI	OUTPLANT	4.5	22.1053	1	6
MIAMI	OUTPLANT	9	53.6842	2	15
MIAMI	OUTPLANT	11.7	34.7368	2	10
MIAMI	NURSERY	4	84	1	9
MIAMI	NURSERY	16	120.857	6	15
MIAMI	NURSERY	3	47.1429	1	6
MIAMI	NURSERY	3.5	84	1	11
MIAMI	NURSERY	3.9	45.65	1	6
MIAMI	NURSERY	2.9	29.15	2	4
MIAMI	NURSERY	4.2	28.05	1	4
MIAMI	NURSERY	3	60	1	9
MIAMI	NURSERY	4	66	1	10
MIAMI	NURSERY	5	78	2	12
MIAMI	NURSERY	22	182.571	5	29
MIAMI	NURSERY	3	60	1	10
MIAMI	NURSERY	2.5	66	1	11
MIAMI	NURSERY	2	36	1	6
MIAMI	NURSERY	5.4	47.85	1	8
MIAMI	NURSERY	4.4	35.2	1	6
MIAMI	NURSERY	3	67.2	1	12
MIAMI	NURSERY	4.2	53.9	1	10
MIAMI	NURSERY	26	112.286	6	21
MIAMI	NURSERY	7	10.6286	1	2
MIAMI	NURSERY	20	10.5429	4	2
MIAMI	NURSERY	4.5	30.8571	2	6
MIAMI	NURSERY	4	25.7143	1	5
MIAMI	NURSERY	5	40.2857	1	8
MIAMI	NURSERY	9	84	3	17
MIAMI	NURSERY	5.7	42.35	1	9
MIAMI	NURSERY	5.5	51.4286	2	11
MIAMI	NURSERY	3.8	27.5	1	6
MIAMI	NURSERY	3	49.7143	1	11
MIAMI	NURSERY	7	72	2	16
MIAMI	NURSERY	9	89.1429	3	21
MIAMI	NURSERY	3.5	58.5429	1	14
MIAMI	NURSERY	8	83.1429	4	20
MIAMI	NURSERY	4.8	31.9	1	8
MIAMI	NURSERY	5	55.7143	2	14
MIAMI	NURSERY	7	74.5714	1	19
MIAMI	NURSERY	5	48.8571	2	13
MIAMI	NURSERY	12	22.3714	2	6
MIAMI	NURSERY	4	18.5143	1	5
MIAMI	NURSERY	5	36	3	10
MIAMI	NURSERY	5	42.8571	2	12
MIAMI	NURSERY	5.5	41.1429	2	12
MIAMI	NURSERY	3.5	27.4286	1	8
MIAMI	NURSERY	3	23.1429	1	7
MIAMI	NURSERY	4	12.8571	1	5
MIAMI	NURSERY	3.5	12	1	5
MIAMI	NURSERY	2.5	16.2857	1	7
MIAMI	NURSERY	4	8.57143	1	5
MIAMI	NURSERY	2.5	0.857143	1	1
MIAMI	NURSERY	4.4	3.85	2	7
MIAMI	NURSERY	9	*	3
MIAMI	NURSERY	2.5	*	1
MIAMI	NURSERY	4	*	1	*
MIAMI	NURSERY	7	54	1	7
MIAMI	NURSERY	6.3	50.7273	2	10
MIAMI	NURSERY	4.6	43.6364	1	9
MIAMI	NURSERY	4.4	24	1	5
MIAMI	NURSERY	3.3	23.4545	1	5
MIAMI	NURSERY	4	18.5455	1	4
MIAMI	NURSERY	3.3	17.4545	1	4
MIAMI	NURSERY	2.3	12	1	3
MIAMI	NURSERY	2.2	12	1	4
MIAMI	NURSERY	3	14.1818	1	5
MIAMI	NURSERY	3.7	14.1818	1	5
MIAMI	NURSERY	3	13.0909	1	5
MIAMI	NURSERY	1.5	5.45455	1	3
MIAMI	OUTPLANT	10	76	2	15
MIAMI	OUTPLANT	13.5	25	3	5
MIAMI	OUTPLANT	10.8	66	2	14
MIAMI	OUTPLANT	10.5	24	1	6
MIAMI	OUTPLANT	6.9	15	2	4
MIAMI	OUTPLANT	9.2	13	1	4
MIAMI	OUTPLANT	15.5	*	4	*
MIAMI	OUTPLANT	11.5	*	3	*
MIAMI	OUTPLANT	7.8	76	1	12
MIAMI	OUTPLANT	10.5	84	4	17
MIAMI	OUTPLANT	7	42	1	10
MIAMI	OUTPLANT	10	44	3	12
MIAMI	OUTPLANT	10.5	*	2
MIAMI	OUTPLANT	5	47	1	8
MIAMI	OUTPLANT	9.5	37	3	7
MIAMI	OUTPLANT	12	68	3	14
MIAMI	OUTPLANT	9.5	56	1	12
MIAMI	OUTPLANT	22	74	5	16
MIAMI	OUTPLANT	8.8	36	2	6
MIAMI	OUTPLANT	10	43	1	11
MIAMI	OUTPLANT	6.3	*	1	*
MIAMI	OUTPLANT	8	*	1
MIAMI	NURSERY	2.7	37.0909	1	6
MIAMI	NURSERY	4.3	36	1	6
MIAMI	NURSERY	3.8	39.2727	1	8
MIAMI	NURSERY	5	33.8182	1	7
MIAMI	NURSERY	5.5	50.1818	1	11
MIAMI	NURSERY	2.4	13.0909	1	3
MIAMI	NURSERY	5.1	38.1818	1	9
MIAMI	NURSERY	4.4	27.2727	1	7
MIAMI	NURSERY	2.5	15.2727	1	4
MIAMI	NURSERY	2.4	19.0909	1	5
MIAMI	NURSERY	3	13.0909	1	4
MIAMI	NURSERY	2.2	21.8182	1	7
MIAMI	NURSERY	4.2	7.15	1	1
MIAMI	NURSERY	2.5	37.8	1	6
MIAMI	NURSERY	2.5	18.24	1	3
MIAMI	NURSERY	4	6.05	1	1
MIAMI	NURSERY	3.6	6.05	1	1
MIAMI	NURSERY	2.5	29.28	1	5
MIAMI	NURSERY	3.4	5.5	1	1
MIAMI	NURSERY	6	47.7429	2	10
MIAMI	NURSERY	5	14.3	1	3
MIAMI	NURSERY	3	46.8	1	10
MIAMI	NURSERY	1	16.44	1	4
MIAMI	NURSERY	1.5	24.3429	1	6
MIAMI	NURSERY	1	7.92	1	2
MIAMI	NURSERY	2.5	22.08	1	6
MIAMI	NURSERY	2	32.4	1	9
MIAMI	NURSERY	3	9.68571	1	3
MIAMI	NURSERY	2.5	0.24	1	1
MIAMI	NURSERY	4	*	1	*
MIAMI	NURSERY	4.3	*	1	*
MIAMI	NURSERY	3.8	*	1	*
MIAMI	NURSERY	2.5	*	1	*
MIAMI	NURSERY	4	*	1	*
MIAMI	NURSERY	4.2	*	1	1
MIAMI	OUTPLANT	7.5	14	2	2
MIAMI	OUTPLANT	*	43		8
MIAMI	OUTPLANT	5	*	1	*
MIAMI	OUTPLANT	13	*	2
MIAMI	OUTPLANT	9.5	85	2	21
MIAMI	OUTPLANT	13.8	12	3	3
MIAMI	OUTPLANT	7.6	*	1	*
MIAMI	OUTPLANT	10	*	1	*
MIAMI	OUTPLANT	10.5	78	2	11
MIAMI	OUTPLANT	13	77	3	12
MIAMI	OUTPLANT	13	30	2	5
MIAMI	OUTPLANT	11.5	29	3	6
MIAMI	OUTPLANT	9	32	2	8
MIAMI	OUTPLANT	7.5	7.5	3	1
MIAMI	OUTPLANT	11	39.5	3	6
MIAMI	OUTPLANT	8	24	2	4
MIAMI	OUTPLANT	11.5	22	3	4
MIAMI	OUTPLANT	7.8	26	2	6
MIAMI	NURSERY	11	78.5143	4	11
MIAMI	NURSERY	15	91.4571	3	13
MIAMI	NURSERY	3	62.4	1	9
MIAMI	NURSERY	14	81.6857	5	12
MIAMI	NURSERY	3	64.2	1	10
MIAMI	NURSERY	10	55.8857	3	9
MIAMI	NURSERY	7.2	55.55	2	9
MIAMI	NURSERY	4	61.2	1	10
MIAMI	NURSERY	18	76.4571	6	13
MIAMI	NURSERY	3	28.8	1	5
MIAMI	NURSERY	7	80.4	2	14
MIAMI	NURSERY	3	39.6	1	7
MIAMI	NURSERY	6	61.6286	1	11
MIAMI	NURSERY	6	38.2286	2	7
MIAMI	NURSERY	4	37.9714	1	7
MIAMI	NURSERY	5.3	32.45	1	6
MIAMI	NURSERY	5.9	37.4	2	7
MIAMI	NURSERY	7	58.5429	2	11
MIAMI	NURSERY	1.5	42	1	8
MIAMI	NURSERY	2.5	15.6	1	3
MIAMI	NURSERY	6	36.3429	2	7
MIAMI	NURSERY	4.8	30.25	1	6
MIAMI	NURSERY	10.4	39.6	2	8
MIAMI	NURSERY	10	29.4	3	6
MIAMI	NURSERY	7	93	2	19
MIAMI	NURSERY	4.8	34.1	1	7
MIAMI	NURSERY	3.5	24.3429	1	5
MIAMI	NURSERY	3.5	34.0286	1	7
MIAMI	NURSERY	2.5	23.3143	1	5
MIAMI	NURSERY	5	37.0286	1	8
MIAMI	NURSERY	4	55.2	2	12
MIAMI	NURSERY	7	40.1143	3	9
MIAMI	NURSERY	4.5	56.4	1	13
MIAMI	NURSERY	2	20.8286	1	5
MIAMI	NURSERY	3	16.4571	1	4
MIAMI	NURSERY	7.6	30.8	2	8
MIAMI	NURSERY	4	30.2571	1	8
MIAMI	NURSERY	2.5	18.5143	1	5
MIAMI	NURSERY	3	24.6857	1	7
MIAMI	NURSERY	3	20.8286	1	6
MIAMI	NURSERY	5.3	30.8	1	9
MIAMI	NURSERY	3.8	23.1	1	7
MIAMI	NURSERY	5	9	1	3
MIAMI	NURSERY	2.5	15.7714	1	6
MIAMI	NURSERY	2.8	4.95	1	2
MIAMI	NURSERY	6.5	14.8286	2	6
MIAMI	NURSERY	2.5	1.97143	1	1
MIAMI	NURSERY	4	0.942857	1	1
MIAMI	NURSERY	2.5	2.57143	1
MIAMI	NURSERY	2	28.2857	1	4
MIAMI	NURSERY	3	77.16	1	11
MIAMI	NURSERY	4	48	1	7
MIAMI	NURSERY	4.6	38.5	1	6
MIAMI	NURSERY	2.5	81.48	1	13
MIAMI	NURSERY	2.5	61.56	1	10
MIAMI	NURSERY	2	53.28	1	9
MIAMI	NURSERY	11.5	41.1429	1	7
MIAMI	NURSERY	18	104.571	6	18
MIAMI	NURSERY	2.5	62.76	1	11
MIAMI	NURSERY	3.5	39.4286	1	7
MIAMI	NURSERY	2.5	60.72	1	11
MIAMI	NURSERY	4.8	5.5	1	1
MIAMI	NURSERY	3.5	27.4286	1	5
MIAMI	NURSERY	4.5	32.45	1	6
MIAMI	NURSERY	4.8	32.45	1	6
MIAMI	NURSERY	11	30.8571	3	6
MIAMI	NURSERY	3	65.4	1	13
MIAMI	NURSERY	3	24	2	5
MIAMI	NURSERY	3	36	1	8
MIAMI	NURSERY	3	36	1	8
MIAMI	NURSERY	5	30.8571	5	7
MIAMI	NURSERY	4.4	21.45	1	5
MIAMI	NURSERY	3.4	12.1	1	3
MIAMI	NURSERY	0.5	20.16	1	5
MIAMI	NURSERY	4.7	28.05	1	7
MIAMI	NURSERY	2	24	1	6
MIAMI	NURSERY	3	18.8571	1	5
MIAMI	NURSERY	3.6	25.85	1	7
MIAMI	NURSERY	3	21.4286	1	6
MIAMI	NURSERY	3	24	1	7
MIAMI	NURSERY	2.5	2.57143	1	3
MIAMI	NURSERY	9	*	1	*
MIAMI	NURSERY	6.5	*	4	*
MIAMI	NURSERY	4.2	*	1	*
MIAMI	NURSERY	2	*	1	*
MIAMI	NURSERY	5	*	1	1
MIAMI	OUTPLANT	7	12	1	3
MIAMI	OUTPLANT	8	15.5	1	5
MIAMI	OUTPLANT	*	18		6
MIAMI	OUTPLANT	8.2	17	1	7
MIAMI	OUTPLANT	6	28	1	4
MIAMI	OUTPLANT	8	28	2	6
MIAMI	OUTPLANT	6.5	*	1	*
MIAMI	OUTPLANT	6.5	*	1	*
MIAMI	NURSERY	1.5	30.8571	1	1
MIAMI	NURSERY	3	117.6	1	10
MIAMI	NURSERY	3	56.4	1	8
MIAMI	NURSERY	7.5	70.8857	3	12
MIAMI	NURSERY	4	68.4	4	13
MIAMI	NURSERY	4	78	2	15
MIAMI	NURSERY	3	61.2	1	12
MIAMI	NURSERY	3	52.8	2	11
MIAMI	NURSERY	10	45.3429	4	10
MIAMI	NURSERY	1.5	30	1	7
MIAMI	NURSERY	1.5	20.0571	1	5
MIAMI	NURSERY	8	30.8	3	8
MIAMI	NURSERY	4.5	3.85	1	1
MIAMI	NURSERY	7	26.4	2	7
MIAMI	NURSERY	5.5	26.4	1	8
MIAMI	NURSERY	4	26.2286	3	9
MIAMI	NURSERY	1.5	18	1	8
MIAMI	NURSERY	2.5	2.2	1	1
MIAMI	NURSERY	11	17.6	3	8
MIAMI	NURSERY	3.5	2.2	1	1
MIAMI	NURSERY	8	7.7	2	4
MIAMI	NURSERY	7.5	5.5	6	3
MIAMI	NURSERY	3	12	1	11
MIAMI	NURSERY	9	0.857143	3	*
MIAMI	NURSERY	3	*	1	*
MIAMI	NURSERY	15	*	6	*
DR	NURSERY	19	137
DR	NURSERY	18	142
DR	NURSERY	17	169.5
DR	NURSERY	15	180
DR	NURSERY	25	203
DR	NURSERY	19	201.5
DR	NURSERY	16	211.5
DR	NURSERY	18	217.5
DR	NURSERY	16	235
DR	NURSERY	20	244
DR	NURSERY	21	251
DR	NURSERY	26	279.5
DR	NURSERY	19	321
DR	NURSERY	32	398
DR	NURSERY	29	546
DR	NURSERY	45	567
DR	NURSERY	21	543
DR	NURSERY	12	544
DR	NURSERY	10	545
DR	NURSERY	14.5	78	2	9
DR	NURSERY	18.5	49	3	11
DR	NURSERY	10.5	52	2	12
DR	NURSERY	6	22	1	6
DR	NURSERY	10.4	*	1	*
DR	NURSERY	17.5	*	2	*
DR	NURSERY	19.5	*	3
DR	NURSERY	15.2	*	2	*
DR	NURSERY	23.5	85	3	8
DR	NURSERY	16	112	3	21
DR	NURSERY	7.5	26	1	5
DR	NURSERY	6.5	30	1	6
DR	NURSERY	33.5	23	5	5
DR	NURSERY	12.5	9	2	2
DR	NURSERY	18	75	4	7
DR	NURSERY	16	63	3	7
DR	NURSERY	17.5	63	3	10
MIAMI	NURSERY	5.5	72.5143	1	7
MIAMI	NURSERY	4	31.0286	1	3
MIAMI	NURSERY	4	112.8	1	11
MIAMI	NURSERY	4	70.8	1	7
MIAMI	NURSERY	3	102	1	11
MIAMI	NURSERY	10	88.0286	4	10
MIAMI	NURSERY	2	79.2	1	9
MIAMI	NURSERY	4	76.8	1	9
MIAMI	NURSERY	3	90	1	11
MIAMI	NURSERY	6	112.8	1	14
MIAMI	NURSERY	4	79.2	1	10
MIAMI	NURSERY	3	62.4	1	8
MIAMI	NURSERY	2.5	21.6	1	3
MIAMI	NURSERY	3.5	70.8	1	11
MIAMI	NURSERY	3.5	31.5429	1	5
MIAMI	NURSERY	7	43.9714	2	7
MIAMI	NURSERY	4	31.1143	2	5
MIAMI	NURSERY	3.5	36.5143	1	6
MIAMI	NURSERY	2	18.1714	1	3
MIAMI	NURSERY	4	18	2	3
MIAMI	NURSERY	3	27.9429	1	5
MIAMI	NURSERY	7.5	27.9429	3	5
MIAMI	NURSERY	4	31.9	1	6
MIAMI	NURSERY	2	15.9429	1	3
MIAMI	NURSERY	5	30.8	1	6
MIAMI	NURSERY	3.5	25.1143	1	5
MIAMI	NURSERY	2.5	9.68571	1	2
MIAMI	NURSERY	2	9.6	1	2
MIAMI	NURSERY	2	19.1143	1	4
MIAMI	NURSERY	3	27.9429	1	6
MIAMI	NURSERY	5.5	46.2	1	10
MIAMI	NURSERY	4.5	31.9	1	7
MIAMI	NURSERY	5.5	39.0857	2	9
MIAMI	NURSERY	5.5	25.3	1	6
MIAMI	NURSERY	7	50.6	1	12
MIAMI	NURSERY	3.5	16.8	1	4
MIAMI	NURSERY	4	24.75	1	6
MIAMI	NURSERY	4	28.6	1	7
MIAMI	NURSERY	11	59.4	2	15
MIAMI	NURSERY	3	7.37143	1	2
MIAMI	NURSERY	2.5	22.8857	1	7
MIAMI	NURSERY	4	19.25	1	6
MIAMI	NURSERY	3.5	3.08571	1	1
MIAMI	NURSERY	2	8.91429	1	3
MIAMI	NURSERY	3	2.65714	1	1
MIAMI	NURSERY	13.5	*	4	*
MIAMI	NURSERY	3	*	1
MIAMI	NURSERY	6	*	2	*
MIAMI	NURSERY	5	*	2	*
MIAMI	NURSERY	9.5	*	4	*
MIAMI	NURSERY	3.5	*	1	*
MIAMI	NURSERY	3	*	1	*
MIAMI	NURSERY	9	*	3	*
MIAMI	NURSERY	5.5	*	2	*
MIAMI	NURSERY	5.5	*	2	*
MIAMI	NURSERY	10	*	3	*
MIAMI	NURSERY	6	*	3	*
MIAMI	NURSERY	2.5	*	1
MIAMI	OUTPLANT	5.1	17	1	3
MIAMI	OUTPLANT	4.8	13	1	3
MIAMI	OUTPLANT	5.5	17	1	4
MIAMI	OUTPLANT	6	*	1	*
MIAMI	OUTPLANT	10	43	2	7
MIAMI	OUTPLANT	4	46.5	1	9
MIAMI	OUTPLANT	6.5	14.5	2	3
MIAMI	OUTPLANT	8	61	2	14
MIAMI	OUTPLANT	*	38		10
MIAMI	OUTPLANT	6.5	10	1	1
MIAMI	OUTPLANT	15	41	4	7
MIAMI	OUTPLANT	20	*	5	*
MIAMI	OUTPLANT	*	8		1
MIAMI	OUTPLANT	11	50	3	11
MIAMI	OUTPLANT	7.5	27.5	1	7
MIAMI	OUTPLANT	6.5	*	1	*
MIAMI	OUTPLANT	5	*	1
MIAMI	NURSERY	3.5	51.12	1	8
MIAMI	NURSERY	3	37.7143	1	6
MIAMI	NURSERY	3	55.56	2	9
MIAMI	NURSERY	3	30.72	1	5
MIAMI	NURSERY	9	99.4286	3	17
MIAMI	NURSERY	1	20.28	1	4
MIAMI	NURSERY	3	19.7143	1	4
MIAMI	NURSERY	2.5	31.56	1	7
MIAMI	NURSERY	3	30.8571	1	7
MIAMI	NURSERY	4.5	54.8571	1	13
MIAMI	NURSERY	1.5	12	1	3
MIAMI	NURSERY	4	47.1429	1	12
MIAMI	NURSERY	3	30.8571	1	9
MIAMI	NURSERY	1.5	14.1429	1	7
MIAMI	NURSERY	5.8	*	1	*
MIAMI	NURSERY	5.4	*	1	*
MIAMI	NURSERY	4.6	*	1	*
MIAMI	NURSERY	4.9	*	1	*
MIAMI	NURSERY	5.8	*	1	*
MIAMI	NURSERY	5.5	*	1	*
MIAMI	NURSERY	2.5	30.24	1	*
MIAMI	NURSERY	6.2	*	1	*
MIAMI	NURSERY	5.4	*	1	*
MIAMI	NURSERY	7.8	*	2	*
MIAMI	NURSERY	5.2	*	1
MIAMI	OUTPLANT	8.9	34	2	6
MIAMI	OUTPLANT	11	22	2	4
MIAMI	OUTPLANT	16	52	5	10
MIAMI	OUTPLANT	6.5	25	1	5
MIAMI	OUTPLANT	6.6	16	2	5
MIAMI	OUTPLANT	5.1	9	1	3
MIAMI	OUTPLANT	17	*	3	*
MIAMI	OUTPLANT	15.5	*	3	*
DR	NURSERY	12	28.5
DR	NURSERY	10	28.5
DR	NURSERY	20	42
DR	NURSERY	12	37
DR	NURSERY	12	38
DR	NURSERY	11	42
DR	NURSERY	9	49.5
DR	NURSERY	13	57.5
DR	NURSERY	21	82
DR	NURSERY	44	142
DR	NURSERY	18.7	90.5
DR	NURSERY	29.4	116
DR	NURSERY	21.8	122.5
DR	NURSERY	21.6	135
DR	NURSERY	20	166.5
DR	NURSERY	28	220
DR	NURSERY	22	222
MIAMI	NURSERY	5	38.5	1	1
MIAMI	NURSERY	*	39.4286		4
MIAMI	NURSERY	3	31.2	1	4
MIAMI	NURSERY	2	22.8	1	3
MIAMI	NURSERY	2.5	21.4286	2	3
MIAMI	NURSERY	2	25.7143	1	4
MIAMI	NURSERY	*	30.8571		5
MIAMI	NURSERY	4	24	1	4
MIAMI	NURSERY	3.5	30	1	5
MIAMI	NURSERY	2.5	30	2	5
MIAMI	NURSERY	2	18	1	3
MIAMI	NURSERY	2	23.1429	1	4
MIAMI	NURSERY	2.5	32.4	1	6
MIAMI	NURSERY	5.5	26.95	1	5
MIAMI	NURSERY	3	36	1	7
MIAMI	NURSERY	4.5	20.35	1	4
MIAMI	NURSERY	4.5	14.3	1	3
MIAMI	NURSERY	5	34.2857	3	8
MIAMI	NURSERY	6	17.1429	2	4
MIAMI	NURSERY	5	25.7143	2	6
MIAMI	NURSERY	4.5	14.85	1	4
MIAMI	NURSERY	*	17.1429		5
MIAMI	NURSERY	4	8.8	1	3
MIAMI	NURSERY	1	8.57143	1	3
MIAMI	NURSERY	1	8.57143	1	3
MIAMI	NURSERY	2	12.8571	1	5
MIAMI	NURSERY	2.5	9.42857	1	4
MIAMI	NURSERY	3.5	*	1	*
MIAMI	NURSERY	6.4	*	1	*
MIAMI	NURSERY	3.5	*	1	*
MIAMI	NURSERY	6.5	*	1	*
MIAMI	NURSERY	4	*	1	*
MIAMI	NURSERY	5	*	1	*
MIAMI	NURSERY	2	*	1	*
MIAMI	NURSERY	1.5	*	1	*
MIAMI	NURSERY	1.5	*	1	*
MIAMI	NURSERY	3.4	26.1818	1	5
MIAMI	NURSERY	5.6	43.6364	3	9
MIAMI	NURSERY	7.2	32.7273	4	7
MIAMI	NURSERY	5.3	27.2727	1	6
MIAMI	NURSERY	6	31.6364	1	7
MIAMI	NURSERY	1.4	4.36364	1	1
MIAMI	NURSERY	5	43.6364	1	11
MIAMI	NURSERY	1.6	7.63636	2	2
MIAMI	NURSERY	3.5	33.8182	1	9
MIAMI	NURSERY	5.3	20.7273	1	6
MIAMI	NURSERY	1.5	3.27273	1	1
MIAMI	NURSERY	2.8	28.9091	3	9
MIAMI	NURSERY	3.1	28.3636	1	9
MIAMI	NURSERY	2.5	28.3636	1	9
MIAMI	NURSERY	3.3	28.3636	1	9
MIAMI	NURSERY	3.7	21.8182	1	7
MIAMI	NURSERY	3.3	20.1818	1	7
MIAMI	NURSERY	1.5	4.90909	1	2
MIAMI	NURSERY	1.4	12	1	5
MIAMI	NURSERY	3.4	24	1	11
MIAMI	NURSERY	2.4	13.0909	1	6
MIAMI	NURSERY	2.7	17.4545	1	8
MIAMI	NURSERY	4.8	2.18182	1	1
MIAMI	NURSERY	1.9	13.6364	1	7
MIAMI	NURSERY	1.1	5.45455	1	3
MIAMI	NURSERY	2.4	6.54545	1	4
MIAMI	NURSERY	1.9	3.27273	1	2
MIAMI	NURSERY	2	2.18182	1	2
MIAMI	NURSERY	3.3	1.09091	1	1
MIAMI	NURSERY	1	1.09091	1	1
MIAMI	NURSERY	5	*	1	*
MIAMI	OUTPLANT	4.8	44	1	6
MIAMI	OUTPLANT	9	37	2	6
MIAMI	OUTPLANT	3.5	35	1	6
MIAMI	OUTPLANT	4.5	*	1	*
MIAMI	OUTPLANT	9	29	2	5
MIAMI	OUTPLANT	8	16	1	3
MIAMI	OUTPLANT	9.5	5	2	1
MIAMI	OUTPLANT	7	*	1	*
MIAMI	OUTPLANT	11.5	*	4
MIAMI	OUTPLANT	10.4	9.47368	2	1
MIAMI	OUTPLANT	7.9	50.5263	1	6
MIAMI	OUTPLANT	15.6	56.8421	3	8
MIAMI	OUTPLANT	5	41.0526	1	6
MIAMI	OUTPLANT	10.5	25.2632	1	4
MIAMI	OUTPLANT	4	6.31579	1	1
MIAMI	OUTPLANT	14.6	25.2632	3	4
MIAMI	OUTPLANT	8.7	120	1	20
MIAMI	OUTPLANT	10.5	22.1053	1	4
MIAMI	OUTPLANT	6.5	22.1053	1	4
MIAMI	OUTPLANT	15	44.2105	3	8
MIAMI	OUTPLANT	12.4	85.2632	1	16
MIAMI	OUTPLANT	6.5	15.7895	2	3
MIAMI	OUTPLANT	6	37.8947	1	8
MIAMI	OUTPLANT	7.9	28.4211	1	6
MIAMI	OUTPLANT	9.5	47.3684	1	10
MIAMI	OUTPLANT	7	41.0526	1	9
MIAMI	OUTPLANT	17.5	34.7368	5	8
MIAMI	OUTPLANT	5.4	25.2632	1	6
MIAMI	OUTPLANT	5	12.6316	1	3
MIAMI	OUTPLANT	11.5	37.8947	2	9
MIAMI	OUTPLANT	7.2	28.4211	1	7
MIAMI	OUTPLANT	7.5	15.7895	1	4
MIAMI	OUTPLANT	8.1	15.7895	1	4
MIAMI	OUTPLANT	6	15.7895	1	4
MIAMI	OUTPLANT	6.5	56.8421	1	15
MIAMI	OUTPLANT	11.2	41.0526	3	11
MIAMI	OUTPLANT	5	22.1053	1	6
MIAMI	OUTPLANT	9.2	25.2632	1	7
MIAMI	OUTPLANT	7.5	28.4211	1	8
MIAMI	OUTPLANT	11.5	28.4211	1	8
MIAMI	OUTPLANT	6	44.2105	1	13
MIAMI	OUTPLANT	12	15.7895	3	5
MIAMI	OUTPLANT	7.5	12.6316	1	4
MIAMI	OUTPLANT	6.3	31.5789	1	10
MIAMI	OUTPLANT	3.5	6.31579	1	2
MIAMI	OUTPLANT	7	12.6316	2	4
MIAMI	OUTPLANT	7	9.47368	1	3
MIAMI	OUTPLANT	5	9.47368	2	3
MIAMI	OUTPLANT	9	7.57895	3	3
MIAMI	OUTPLANT	9.2	9.47368	1	4
MIAMI	OUTPLANT	11.5	18.9474	3	8
MIAMI	OUTPLANT	6	9.47368	1	4
MIAMI	OUTPLANT	5	9.47368	1	4
MIAMI	OUTPLANT	7	12.6316	1	6
MIAMI	OUTPLANT	4.5	7.57895	1	4
MIAMI	OUTPLANT	8.5	*	1	*
MIAMI	OUTPLANT	8.5	*	1	*
MIAMI	OUTPLANT	11	*	1	*
MIAMI	OUTPLANT	14.2	*	2	*
MIAMI	OUTPLANT	9.1	*	1	*
MIAMI	OUTPLANT	7	*	1	*
MIAMI	OUTPLANT	6	*	1	*
MIAMI	OUTPLANT	5	*	1	*
MIAMI	OUTPLANT	5	*	1	*
MIAMI	OUTPLANT	4	*	1	*
MIAMI	OUTPLANT	4	*	1	*
MIAMI	NURSERY	4	132	1	17
MIAMI	NURSERY	4	45.1	1	6
MIAMI	NURSERY	5	78.8571	1	11
MIAMI	NURSERY	4	111.6	1	16
MIAMI	NURSERY	6	54.45	1	8
MIAMI	NURSERY	6	65.1429	2	10
MIAMI	NURSERY	3	75.6	1	12
MIAMI	NURSERY	3	74.4	1	12
MIAMI	NURSERY	2	66	1	11
MIAMI	NURSERY	3	54	1	9
MIAMI	NURSERY	3	23.65	1	4
MIAMI	NURSERY	3	41.1429	1	7
MIAMI	NURSERY	4	29.15	1	5
MIAMI	NURSERY	4	46.2857	1	8
MIAMI	NURSERY	4	91.2	1	16
MIAMI	NURSERY	3	111.6	1	20
MIAMI	NURSERY	4	66.8571	1	12
MIAMI	NURSERY	5	37.4	1	7
MIAMI	NURSERY	4	31.7143	1	6
MIAMI	NURSERY	6	31.7143	1	6
MIAMI	NURSERY	15	128.571	3	26
MIAMI	NURSERY	4	54	1	11
MIAMI	NURSERY	3	29.1429	1	6
MIAMI	NURSERY	4	42.8571	1	9
MIAMI	NURSERY	12	113.143	2	24
MIAMI	NURSERY	4	33	1	7
MIAMI	NURSERY	3	36.8571	1	8
MIAMI	NURSERY	8	41.25	2	9
MIAMI	NURSERY	4	36	1	8
MIAMI	NURSERY	*	48.8571		11
MIAMI	NURSERY	4	39.8571	1	9
MIAMI	NURSERY	*	69.4286		16
MIAMI	NURSERY	5	55.7143	1	13
MIAMI	NURSERY	5	64.2857	2	15
MIAMI	NURSERY	5	72	1	17
MIAMI	NURSERY	5	42	1	10
MIAMI	NURSERY	4	37.7143	1	9
MIAMI	NURSERY	3	20.9	1	5
MIAMI	NURSERY	5	29.1429	2	7
MIAMI	NURSERY	5	54	2	13
MIAMI	NURSERY	5	53.1429	1	13
MIAMI	NURSERY	4.5	45.4286	1	12
MIAMI	NURSERY	3.5	48.8571	1	13
MIAMI	NURSERY	8	48.8571	2	13
MIAMI	NURSERY	2.5	18	1	5
MIAMI	NURSERY	1.5	10.7143	1	3
MIAMI	NURSERY	3.5	41.1429	1	12
MIAMI	NURSERY	4	27.4286	1	8
MIAMI	NURSERY	7	63.4286	2	19
MIAMI	NURSERY	3	3.3	1	1
MIAMI	NURSERY	3	37.7143	1	12
MIAMI	NURSERY	3	30	1	10
MIAMI	NURSERY	2	14.5714	1	6
MIAMI	NURSERY	*	3.42857		2
MIAMI	NURSERY	5	2.57143	1	2
MIAMI	NURSERY	3	*	1	*
MIAMI	NURSERY	3	*	1	*
MIAMI	NURSERY	7.5	*	3
MIAMI	OUTPLANT	8	79	2	17
MIAMI	OUTPLANT	9.1	22	2	5
MIAMI	OUTPLANT	24.3	132	8	32
MIAMI	OUTPLANT	15	110	5	27
MIAMI	OUTPLANT	15	82	4	25
MIAMI	OUTPLANT	9	35	3	11
MIAMI	OUTPLANT	16.5	*	3	*
MIAMI	OUTPLANT	7.5	*	1	*
MIAMI	OUTPLANT	5	*	2	*
MIAMI	OUTPLANT	16	*	4	*
MIAMI	OUTPLANT	12	*	4
MIAMI	OUTPLANT	16.5	*	6
MIAMI	OUTPLANT	13	64	2	9
MIAMI	OUTPLANT	10.5	36	3	6
MIAMI	OUTPLANT	9	41.5	2	7
MIAMI	OUTPLANT	11	50	4	11
MIAMI	OUTPLANT	6.3	13	1	1
MIAMI	OUTPLANT	12.5	6	3	1
MIAMI	OUTPLANT	10	25	2	7
MIAMI	OUTPLANT	7	12	1	4
MIAMI	OUTPLANT	8.5	*	1
MIAMI	OUTPLANT	10	22	2	5
MIAMI	OUTPLANT	11	25	2	6
MIAMI	OUTPLANT	13	31	4	10
MIAMI	OUTPLANT	11	19.5	3	8
MIAMI	OUTPLANT	8	7.5	3	2
MIAMI	OUTPLANT	6.4	12	1	5
MIAMI	OUTPLANT	9	*	1
MIAMI	OUTPLANT	13.5	*	4
MIAMI	OUTPLANT	18	104.211	4	21
MIAMI	OUTPLANT	6.75	69.4737	1	14
MIAMI	OUTPLANT	11	44.2105	2	9
MIAMI	OUTPLANT	11.25	82.1053	3	18
MIAMI	OUTPLANT	13.05	123.158	2	29
MIAMI	OUTPLANT	6.3	50.5263	1	13
MIAMI	OUTPLANT	6.75	67.5789	2	18
MIAMI	OUTPLANT	11	44.2105	2	12
MIAMI	OUTPLANT	7.2	34.7368	2	10
MIAMI	OUTPLANT	9	44.2105	2	13
MIAMI	OUTPLANT	13	53.6842	3	16
MIAMI	OUTPLANT	8	25.2632	1	8
MIAMI	OUTPLANT	4.5	25.2632	1	8
MIAMI	OUTPLANT	5	41.0526	1	13
MIAMI	OUTPLANT	9.9	69.4737	3	22
MIAMI	OUTPLANT	8.1	34.7368	2	11
MIAMI	OUTPLANT	10	41.0526	2	13
MIAMI	OUTPLANT	12.6	25.2632	5	8
MIAMI	OUTPLANT	10.8	37.8947	3	12
MIAMI	OUTPLANT	8.55	9.47368	1	3
MIAMI	OUTPLANT	7	9.47368	1	3
MIAMI	OUTPLANT	8.1	72.6316	1	24
MIAMI	OUTPLANT	8	28.4211	1	10
MIAMI	OUTPLANT	13	37.8947	2	14
MIAMI	OUTPLANT	9	31.5789	2	12
MIAMI	OUTPLANT	6	28.4211	2	11
MIAMI	OUTPLANT	9	25.2632	1	10
MIAMI	OUTPLANT	4.5	12.6316	1	5
MIAMI	OUTPLANT	12	34.7368	3	14
MIAMI	OUTPLANT	3	18.9474	1	8
MIAMI	OUTPLANT	3.15	9.47368	1	4
MIAMI	OUTPLANT	6.3	9.47368	2	4
MIAMI	OUTPLANT	7	34.7368	1	16
MIAMI	OUTPLANT	7.2	41.0526	2	19
MIAMI	OUTPLANT	7.2	31.5789	2	15
MIAMI	OUTPLANT	9.45	15.7895	3	8
MIAMI	OUTPLANT	4	9.47368	1	5
MIAMI	OUTPLANT	4	9.47368	1	5
MIAMI	OUTPLANT	4.05	15.7895	1	9
MIAMI	OUTPLANT	2.7	12.6316	1	8
MIAMI	NURSERY	5.6	26.1818	2	4
MIAMI	NURSERY	5.9	27.2727	2	5
MIAMI	NURSERY	3.5	27.2727	1	5
MIAMI	NURSERY	4	60	2	11
MIAMI	NURSERY	1.8	42.5455	1	8
MIAMI	NURSERY	5.7	36	2	7
MIAMI	NURSERY	5.4	40.3636	2	8
MIAMI	NURSERY	5.7	91.6364	1	19
MIAMI	NURSERY	3.8	46.9091	1	10
MIAMI	NURSERY	4.3	18.5455	1	4
MIAMI	NURSERY	3.9	18.5455	1	4
MIAMI	NURSERY	3	17.4545	1	4
MIAMI	NURSERY	4	34.3636	1	8
MIAMI	NURSERY	4.8	25.0909	1	6
MIAMI	NURSERY	3.4	25.0909	1	6
MIAMI	NURSERY	4.2	69.8182	1	17
MIAMI	NURSERY	3	12	1	3
MIAMI	NURSERY	5	27.2727	1	7
MIAMI	NURSERY	2.8	7.63636	1	2
MIAMI	NURSERY	3.7	54	1	15
MIAMI	NURSERY	2.6	42	1	12
MIAMI	NURSERY	4	33.8182	1	11
MIAMI	NURSERY	3.9	32.7273	1	11
MIAMI	NURSERY	3.8	19.6364	1	7
MIAMI	NURSERY	1.6	7.63636	1	4
MIAMI	NURSERY	8	158.4	6	17
MIAMI	NURSERY	2.5	76.8	1	11
MIAMI	NURSERY	6	81.6	3	12
MIAMI	NURSERY	2	54	1	8
MIAMI	NURSERY	4	78	2	12
MIAMI	NURSERY	2	54	1	9
MIAMI	NURSERY	5	64.8	1	11
MIAMI	NURSERY	2	51.6	1	9
MIAMI	NURSERY	2.5	21.0857	5	4
MIAMI	NURSERY	3	42	1	8
MIAMI	NURSERY	3	48.7714	1	10
MIAMI	NURSERY	6	43.45	1	9
MIAMI	NURSERY	5	23.1	1	5
MIAMI	NURSERY	2	44.4	1	10
MIAMI	NURSERY	3	42.6857	1	10
MIAMI	NURSERY	1.5	37.2	1	9
MIAMI	NURSERY	2	36.5143	1	9
MIAMI	NURSERY	5	31.35	1	8
MIAMI	NURSERY	1.5	39.0857	1	10
MIAMI	NURSERY	2.5	29.8286	1	8
MIAMI	NURSERY	1.5	32.2286	1	9
MIAMI	NURSERY	2	14.1429	1	4
MIAMI	NURSERY	5.5	28.05	1	8
MIAMI	NURSERY	4	3.3	1	1
MIAMI	NURSERY	4	6.34286	1	2
MIAMI	NURSERY	5	18.7	1	6
MIAMI	NURSERY	2.5	29.6571	1	10
MIAMI	NURSERY	4	8.4	1	3
MIAMI	NURSERY	3	33.3429	1	12
MIAMI	NURSERY	3.5	13.75	1	5
MIAMI	NURSERY	5	13.75	1	5
MIAMI	NURSERY	3	7.11429	1	3
MIAMI	NURSERY	2	9.25714	1	4
MIAMI	NURSERY	2.5	8.82857	1	4
MIAMI	NURSERY	3.5	9.68571	1	5
MIAMI	NURSERY	5	11.4	1	6
MIAMI	NURSERY	2.5	7.37143	1	4
MIAMI	NURSERY	6.5	5.5	1	3
MIAMI	NURSERY	2	4.54286	1	3
MIAMI	NURSERY	15.5	*	3	*
MIAMI	NURSERY	3	*	1	*
MIAMI	NURSERY	12	*	2	*
MIAMI	NURSERY	4.5	*	2	*
MIAMI	NURSERY	12	*	5	*
MIAMI	NURSERY	2	*	1	*
MIAMI	NURSERY	11.5	*	1	11
MIAMI	NURSERY	2.5	*	1	*
MIAMI	NURSERY	3	*	1	*
MIAMI	NURSERY	10	*	6	*
MIAMI	NURSERY	8	*	3	*
MIAMI	NURSERY	3	*	1	*
MIAMI	NURSERY	1.5	*	1	3
MIAMI	NURSERY	2	*	1	*
MIAMI	OUTPLANT	12.5	120	3	20
MIAMI	OUTPLANT	7	70	2	14
MIAMI	OUTPLANT	10.5	73	3	12
MIAMI	OUTPLANT	8	41	1	11
MIAMI	NURSERY	4	100.8	2	12
MIAMI	NURSERY	0.5	37.2	1	5
MIAMI	NURSERY	4	74.4	1	11
MIAMI	NURSERY	5	67.2	3	10
MIAMI	NURSERY	0.5	50.4	1	8
MIAMI	NURSERY	1	49.2	1	8
MIAMI	NURSERY	0.5	55.2	1	9
MIAMI	NURSERY	2	46.8	1	8
MIAMI	NURSERY	2.5	56.4	1	10
MIAMI	NURSERY	6	35.2	1	7
MIAMI	NURSERY	4	28.6	1	6
MIAMI	NURSERY	*	60		14
MIAMI	NURSERY	*	47.1429		12
MIAMI	NURSERY	*	40.2857		11
MIAMI	NURSERY	6	18.15	1	5
MIAMI	NURSERY	*	53.1429		16
MIAMI	NURSERY	*	72.8571		23
MIAMI	NURSERY	6	40.2857	2	13
MIAMI	NURSERY	*	15.4286		5
MIAMI	NURSERY	3.5	21.45	1	7
MIAMI	NURSERY	9.5	20.5714	6	7
MIAMI	NURSERY	5.5	2.75	1	1
MIAMI	NURSERY	*	15.4286		6
MIAMI	NURSERY	4	32.5714	2	13
MIAMI	NURSERY	*	28.2857		12
MIAMI	NURSERY	5.5	4.4	1	2
MIAMI	NURSERY	*	36		19
MIAMI	NURSERY	2	6	1	5
MIAMI	NURSERY	3	*	1
MIAMI	NURSERY	3.5	*	1	*
MIAMI	NURSERY	3.8	*	1	*
MIAMI	NURSERY	7	*	2	1
MIAMI	NURSERY	4	*	1
MIAMI	NURSERY	8.2	38.1818	2	8
MIAMI	NURSERY	5.2	19.6364	1	5
MIAMI	NURSERY	3.9	28.3636	2	8
MIAMI	NURSERY	3.6	*	2	*
DR	NURSERY	8	*	1	*
DR	NURSERY	16.5	*	3	*
DR	NURSERY	8.5	*	1	*
DR	NURSERY	2	*	1	*
DR	NURSERY	15.5	*	3	*
DR	NURSERY	14.5	*	2	*
DR	NURSERY	16	*	2	*
DR	NURSERY	24	*	4	*
DR	NURSERY	15	*	3	*
DR	NURSERY	20	*	4	*
DR	NURSERY	11.8	39	1	6
MIAMI	NURSERY	7	45.6	1	7
MIAMI	NURSERY	7.2	33	1	6
MIAMI	NURSERY	1.5	25.68	1	5
MIAMI	NURSERY	4	54.72	1	11
MIAMI	NURSERY	7.6	14.3	1	3
MIAMI	NURSERY	3.5	49.92	1	11
MIAMI	NURSERY	5.4	24.2	2	6
MIAMI	NURSERY	2	35.16	1	9
MIAMI	NURSERY	7.5	37.2	1	11
MIAMI	NURSERY	0.5	8.4	1	3
MIAMI	NURSERY	5.8	10.45	1	4
MIAMI	NURSERY	3.5	7.15	1	3
MIAMI	NURSERY	7.3	2.2	1	1
MIAMI	NURSERY	10.6	1.65	2	1
MIAMI	NURSERY	2	6.84	1	9
MIAMI	NURSERY	9.5	*	2	*
MIAMI	NURSERY	3.7	*	1	1
MIAMI	NURSERY	5.5	*	2	*
MIAMI	NURSERY	5	*	2	*
MIAMI	NURSERY	7.5	*	4	*
MIAMI	NURSERY	5.5	*	2	*
MIAMI	NURSERY	3.5	*	1	*
MIAMI	NURSERY	1.5	*	1	*
MIAMI	NURSERY	2.5	*	1	*
MIAMI	NURSERY	2.5	*	1	*
MIAMI	NURSERY	2	*	1	*
MIAMI	NURSERY	6.2	*	1
MIAMI	NURSERY	5.8	*	1
MIAMI	NURSERY	5	22.9091	1	4
MIAMI	NURSERY	2.1	15.2727	1	3
MIAMI	NURSERY	3.3	19.6364	1	4
MIAMI	NURSERY	4.9	29.4545	1	6
MIAMI	NURSERY	3.3	28.3636	1	6
MIAMI	NURSERY	6.2	27.2727	1	6
MIAMI	NURSERY	5.2	8.72727	1	2
MIAMI	NURSERY	1.5	20.7273	1	5
MIAMI	NURSERY	4.9	28.3636	2	7
MIAMI	NURSERY	3.1	24	1	6
MIAMI	NURSERY	1.9	15.2727	1	4
MIAMI	NURSERY	2.9	22.9091	1	6
MIAMI	NURSERY	3.3	22.3636	1	6
MIAMI	NURSERY	2.8	18.5455	1	5
MIAMI	NURSERY	3.5	7.09091	1	2
MIAMI	NURSERY	5	16.3636	1	5
MIAMI	NURSERY	2	9.81818	1	4
MIAMI	NURSERY	1.8	4.36364	1	2
MIAMI	NURSERY	5	10.9091	1	5
MIAMI	NURSERY	4	*	2	*
MIAMI	NURSERY	4	*	1	*
MIAMI	NURSERY	4	*	1	*
MIAMI	NURSERY	4	*	1	*
MIAMI	NURSERY	3.7	*	1	*
MIAMI	NURSERY	2	*	1	*
MIAMI	NURSERY	3.5	*	2	*
MIAMI	OUTPLANT	*	11		2
MIAMI	OUTPLANT	*	45		10
MIAMI	OUTPLANT	9	28	2	7
MIAMI	OUTPLANT	6.5	12	2	3
MIAMI	OUTPLANT	5.5	*	1
MIAMI	OUTPLANT	8.5	36	2	6
MIAMI	OUTPLANT	11	47	3	8
MIAMI	OUTPLANT	9	24	2	6
MIAMI	OUTPLANT	9.5	*	2	*
MIAMI	OUTPLANT	14	*	4
DR	NURSERY	10.4	87.5
DR	NURSERY	13.3	111
DR	NURSERY	16.3	118.5
DR	NURSERY	21	193.5
DR	NURSERY	11	190.5
DR	NURSERY	20.6	239
DR	NURSERY	25	334
DR	NURSERY	32	431
MIAMI	NURSERY	13	139.714	3	13
MIAMI	NURSERY	10	108	3	12
MIAMI	NURSERY	11	181.714	2	22
MIAMI	NURSERY	8.5	109.714	3	14
MIAMI	NURSERY	4.5	70.2	2	9
MIAMI	NURSERY	12	63.4286	4	9
MIAMI	NURSERY	*	54		8
MIAMI	NURSERY	4	73.7143	1	11
MIAMI	NURSERY	1.5	76.2857	1	12
MIAMI	NURSERY	6.5	101.143	2	16
MIAMI	NURSERY	3	56.4	1	9
MIAMI	NURSERY	4	36.8571	1	6
MIAMI	NURSERY	3.5	54.8571	2	9
MIAMI	NURSERY	3.5	66.8571	1	11
MIAMI	NURSERY	5.5	84.6	2	14
MIAMI	NURSERY	3.5	54	1	9
MIAMI	NURSERY	12	113.143	3	19
MIAMI	NURSERY	0.5	46.8	1	8
MIAMI	NURSERY	2.8	5.5	1	1
MIAMI	NURSERY	4.5	82.2	2	15
MIAMI	NURSERY	3	16.2857	1	3
MIAMI	NURSERY	5.2	47.3	2	9
MIAMI	NURSERY	9.1	51.7	3	10
MIAMI	NURSERY	6	92.5714	3	18
MIAMI	NURSERY	3	45.6	1	9
MIAMI	NURSERY	5.2	39.6	1	8
MIAMI	NURSERY	54.5	61.7143	2	13
MIAMI	NURSERY	12.6	46.75	5	10
MIAMI	NURSERY	3	79.08	1	17
MIAMI	NURSERY	8	64.2	4	14
MIAMI	NURSERY	8	40.2857	2	9
MIAMI	NURSERY	*	48		11
MIAMI	NURSERY	4	72	1	17
MIAMI	NURSERY	6	29.1429	3	7
MIAMI	NURSERY	5	41.1429	2	10
MIAMI	NURSERY	4.6	40.15	1	10
MIAMI	NURSERY	5	24	1	6
MIAMI	NURSERY	9.3	47.85	2	12
MIAMI	NURSERY	5	57	1	15
MIAMI	NURSERY	5.3	37.4	1	10
MIAMI	NURSERY	2.5	14.5714	1	4
MIAMI	NURSERY	0.5	35.4	1	10
MIAMI	NURSERY	7.2	3.3	2	1
MIAMI	NURSERY	5	11.1429	1	4
MIAMI	NURSERY	8.7	2.2	3	1
MIAMI	NURSERY	2	10.8	1	5
MIAMI	NURSERY	8.4	74.1818	2	11
MIAMI	NURSERY	2.9	46.3636	1	7
MIAMI	NURSERY	8.4	70.9091	2	11
MIAMI	NURSERY	4.8	49.0909	1	8
MIAMI	NURSERY	4.8	29.4545	1	5
MIAMI	NURSERY	5.1	46.9091	1	8
MIAMI	NURSERY	2	40.9091	1	7
MIAMI	NURSERY	12	52.3636	4	9
MIAMI	NURSERY	8.2	69.8182	3	12
MIAMI	NURSERY	3	15.2727	1	3
MIAMI	NURSERY	3.2	29.4545	1	6
MIAMI	NURSERY	4	33.8182	1	7
MIAMI	NURSERY	3.7	19.0909	1	4
MIAMI	NURSERY	3.4	22.9091	1	5
MIAMI	NURSERY	3.2	27.2727	1	6
MIAMI	NURSERY	4.9	36	2	8
MIAMI	NURSERY	2.8	12.5455	1	3
MIAMI	NURSERY	3	32.7273	1	8
MIAMI	NURSERY	3.7	31.6364	1	8
MIAMI	NURSERY	3.6	3.81818	1	1
MIAMI	NURSERY	1.8	10.9091	1	3
MIAMI	NURSERY	4	14.1818	1	4
MIAMI	NURSERY	4	3.27273	1	1
MIAMI	NURSERY	3	3.27273	1	1
MIAMI	NURSERY	5.4	14.1818	2	5
MIAMI	NURSERY	3.7	15.2727	1	6
MIAMI	NURSERY	3	13.6364	1	6
MIAMI	NURSERY	3.6	4.36364	1	2
MIAMI	NURSERY	2	6.54545	1	3
MIAMI	NURSERY	9.2	*	4	*
MIAMI	OUTPLANT	12	53.6842	1	4
MIAMI	OUTPLANT	5.8	44.2105	1	4
MIAMI	OUTPLANT	14.7	85.2632	3	9
MIAMI	OUTPLANT	7.2	25.2632	1	3
MIAMI	OUTPLANT	7	50.5263	1	6
MIAMI	OUTPLANT	15	75.7895	2	9
MIAMI	OUTPLANT	20	151.579	2	19
MIAMI	OUTPLANT	7.3	53.6842	2	7
MIAMI	OUTPLANT	6.7	37.8947	1	5
MIAMI	OUTPLANT	16	101.053	2	14
MIAMI	OUTPLANT	12.1	132.632	2	19
MIAMI	OUTPLANT	10.2	34.7368	3	5
MIAMI	OUTPLANT	15	101.053	2	15
MIAMI	OUTPLANT	15	101.053	2	15
MIAMI	OUTPLANT	4	6.31579	1	1
MIAMI	OUTPLANT	6.5	69.4737	1	11
MIAMI	OUTPLANT	5.5	63.1579	1	10
MIAMI	OUTPLANT	6.1	25.2632	1	4
MIAMI	OUTPLANT	7	37.8947	1	6
MIAMI	OUTPLANT	10.1	56.8421	1	9
MIAMI	OUTPLANT	10.4	56.8421	2	10
MIAMI	OUTPLANT	7	28.4211	1	5
MIAMI	OUTPLANT	15.4	94.7368	2	17
MIAMI	OUTPLANT	6.2	82.1053	2	15
MIAMI	OUTPLANT	7	75.7895	1	14
MIAMI	OUTPLANT	10.2	53.6842	1	10
MIAMI	OUTPLANT	10.2	53.6842	2	10
MIAMI	OUTPLANT	9	53.6842	1	10
MIAMI	OUTPLANT	10	63.1579	2	12
MIAMI	OUTPLANT	5	15.7895	1	3
MIAMI	OUTPLANT	12.9	41.0526	2	8
MIAMI	OUTPLANT	7.4	41.0526	1	8
MIAMI	OUTPLANT	5.1	41.0526	1	8
MIAMI	OUTPLANT	6	50.5263	1	10
MIAMI	OUTPLANT	5.5	50.5263	1	10
MIAMI	OUTPLANT	14.2	104.211	1	21
MIAMI	OUTPLANT	7	88.4211	1	18
MIAMI	OUTPLANT	7.6	44.2105	1	9
MIAMI	OUTPLANT	8	53.6842	1	11
MIAMI	OUTPLANT	9.5	72.6316	1	15
MIAMI	OUTPLANT	5.5	97.8947	1	21
MIAMI	OUTPLANT	16.2	72.6316	4	17
MIAMI	OUTPLANT	7.7	53.6842	1	13
MIAMI	OUTPLANT	9.8	63.1579	2	16
MIAMI	OUTPLANT	4.7	18.9474	1	5
MIAMI	OUTPLANT	5.9	22.1053	1	6
MIAMI	OUTPLANT	6.2	31.5789	1	9
MIAMI	OUTPLANT	6.5	37.8947	1	11
MIAMI	OUTPLANT	6.6	22.1053	1	7
MIAMI	OUTPLANT	7.9	22.1053	2	7
MIAMI	OUTPLANT	16	9.47368	1	3
MIAMI	OUTPLANT	10.4	63.1579	2	22
MIAMI	OUTPLANT	5.6	37.8947	1	14
MIAMI	OUTPLANT	5.9	25.2632	1	10
MIAMI	OUTPLANT	5.8	9.47368	1	4
MIAMI	OUTPLANT	11.7	*	1	*
MIAMI	OUTPLANT	4.7	*	1	*
MIAMI	OUTPLANT	9	*	1	*
MIAMI	OUTPLANT	6.4	66.3158	1	*
MIAMI	OUTPLANT	15.3	96	3	15
MIAMI	OUTPLANT	5	44	1	9
MIAMI	OUTPLANT	8.4	97	4	20
MIAMI	OUTPLANT	6	78	1	17
MIAMI	OUTPLANT	7.5	23	1	7
MIAMI	OUTPLANT	12	*	4	*
MIAMI	OUTPLANT	7.3	48	1	8
MIAMI	OUTPLANT	11	*	2
MIAMI	OUTPLANT	6.5	17.5	1	4
MIAMI	OUTPLANT	7.6	32	1	8
MIAMI	OUTPLANT	7.5	31	1	8
MIAMI	OUTPLANT	8.4	*	1	*
MIAMI	OUTPLANT	6	*	1	1
MIAMI	OUTPLANT	13	64	3	11
MIAMI	OUTPLANT	5	48	1	10
MIAMI	OUTPLANT	7	*	1	*
MIAMI	OUTPLANT	8	*	1	*
MIAMI	OUTPLANT	15.5	32	4	5
MIAMI	OUTPLANT	13.5	43	3	9
MIAMI	OUTPLANT	8.5	12	1	3
MIAMI	OUTPLANT	14	*	3
DR	NURSERY	33.5	136
DR	NURSERY	28.5	135
DR	NURSERY	18	126.5
DR	NURSERY	41	209.5
DR	NURSERY	22	116.5
DR	NURSERY	23	124
DR	NURSERY	42	213
DR	NURSERY	28	52
DR	NURSERY	21	47.5
DR	NURSERY	45	134.5
DR	NURSERY	32.5	170
DR	NURSERY	20	200
DR	NURSERY	56	305
DR	NURSERY	37	349.5
DR	NURSERY	15.5	108	3	11
DR	NURSERY	11	48	1	7
DR	NURSERY	7	37	1	8
DR	NURSERY	7	*	1	*
DR	NURSERY	7.8	*	3	*
DR	NURSERY	9	58	1	8
DR	NURSERY	10	85	2	13
DR	NURSERY	7	39	1	7
DR	NURSERY	7.5	*	1	*
DR	NURSERY	12.5	*	2	*
DR	NURSERY	12	45	1	5
DR	NURSERY	12	35	2	6
DR	NURSERY	8.5	*	1	*
MIAMI	OUTPLANT	20.5	122	3	19
MIAMI	OUTPLANT	6.2	69	1	12
MIAMI	OUTPLANT	15.5	69	3	12
MIAMI	OUTPLANT	11.4	85	3	15
MIAMI	OUTPLANT	17.5	184	5	33
MIAMI	OUTPLANT	14	114	2	23
MIAMI	OUTPLANT	16.5	117	4	29
MIAMI	OUTPLANT	36.4	74	9	22
MIAMI	OUTPLANT	12.8	110	4	22
MIAMI	OUTPLANT	6	35	1	8
MIAMI	OUTPLANT	9	106	2	26
MIAMI	OUTPLANT	12.5	68	2	18
MIAMI	OUTPLANT	5.9	46	1	13
MIAMI	OUTPLANT	23.7	*	5	*
MIAMI	NURSERY	5	56.1	1	2
MIAMI	NURSERY	4	100.8	1	11
MIAMI	NURSERY	5	18	1	2
MIAMI	NURSERY	8	114	5	15
MIAMI	NURSERY	4.5	81.6	3	12
MIAMI	NURSERY	3	58.8	1	9
MIAMI	NURSERY	4	48	1	8
MIAMI	NURSERY	5	67.2	2	12
MIAMI	NURSERY	8	26.95	2	5
MIAMI	NURSERY	7	64.2857	2	12
MIAMI	NURSERY	6	4.95	1	1
MIAMI	NURSERY	6	53.1429	3	11
MIAMI	NURSERY	4	51.4286	2	11
MIAMI	NURSERY	5.5	38.5	1	9
MIAMI	NURSERY	7	90	3	22
MIAMI	NURSERY	0.5	12	1	3
MIAMI	NURSERY	13	98.5714	6	25
MIAMI	NURSERY	5	26.95	1	7
MIAMI	NURSERY	4.5	70.2857	1	19
MIAMI	NURSERY	0.5	27.6	1	8
MIAMI	NURSERY	8	36.8571	3	11
MIAMI	NURSERY	7	3.3	1	1
MIAMI	NURSERY	6	29.7	2	9
MIAMI	NURSERY	6	11.55	2	4
MIAMI	NURSERY	2	13.7143	4	5
MIAMI	NURSERY	5	12	2	5
MIAMI	NURSERY	7	*	2	*
MIAMI	NURSERY	4	*	1	1
MIAMI	OUTPLANT	12.5	118	3	16
MIAMI	OUTPLANT	9.5	34	2	8
MIAMI	OUTPLANT	9.5	37	2	9
MIAMI	OUTPLANT	7	16	3	5
MIAMI	OUTPLANT	13	51	2	16
MIAMI	OUTPLANT	15.5	94	3	11
MIAMI	OUTPLANT	14	81	3	11
MIAMI	OUTPLANT	6	38	1	6
MIAMI	OUTPLANT	13	66	3	12
MIAMI	OUTPLANT	19.5	*	5	*
MIAMI	OUTPLANT	15	58	3	10
MIAMI	OUTPLANT	10.5	27	3	5
MIAMI	OUTPLANT	11.5	32	2	8
MIAMI	OUTPLANT	15.5	*	4
MIAMI	NURSERY	1.5	19.7143	1	2
MIAMI	NURSERY	4	87.6	3	10
MIAMI	NURSERY	5	103.2	3	12
MIAMI	NURSERY	3	85.2	1	10
MIAMI	NURSERY	2	68.4	1	9
MIAMI	NURSERY	1	43.2	1	6
MIAMI	NURSERY	6	61.2	2	9
MIAMI	NURSERY	13	81.4286	3	12
MIAMI	NURSERY	19	90.8571	6	14
MIAMI	NURSERY	19	121.714	7	20
MIAMI	NURSERY	3	46.8	1	8
MIAMI	NURSERY	15	139.714	6	25
MIAMI	NURSERY	2	72	1	13
MIAMI	NURSERY	5	48	1	9
MIAMI	NURSERY	1	42	1	8
MIAMI	NURSERY	7	62.5714	3	12
MIAMI	NURSERY	9	71.1429	6	15
MIAMI	NURSERY	9	47.3	2	10
MIAMI	NURSERY	2	44.5714	1	12
MIAMI	NURSERY	5	14.3	1	4
MIAMI	NURSERY	4	13.75	1	4
MIAMI	NURSERY	9	3.3	3	1
MIAMI	NURSERY	10	23.1	3	7
MIAMI	NURSERY	4	2.2	1	1
MIAMI	NURSERY	8	18.7	2	9
MIAMI	NURSERY	7	1.65	2	1
MIAMI	NURSERY	8.5	*	3	*
MIAMI	NURSERY	6	*	2	1
MIAMI	NURSERY	6.5	*	1	1
MIAMI	OUTPLANT	10.5	42	2	5
MIAMI	OUTPLANT	7	23.5	1	4
MIAMI	OUTPLANT	11	58.5	4	11
MIAMI	OUTPLANT	13	65	3	14
MIAMI	OUTPLANT	11.5	26	4	6
MIAMI	OUTPLANT	9	19	1	3
MIAMI	OUTPLANT	7.5	38	1	6
MIAMI	OUTPLANT	9	53	1	13
MIAMI	OUTPLANT	23.5	32	6	13
MIAMI	OUTPLANT	6.5	60	1	8
MIAMI	OUTPLANT	8.6	41.0526	2	6
MIAMI	OUTPLANT	4.8	34.7368	1	6
MIAMI	OUTPLANT	6.9	22.1053	2	4
MIAMI	OUTPLANT	5.4	15.7895	1	3
MIAMI	OUTPLANT	8.7	72.6316	1	15
MIAMI	OUTPLANT	4.6	18.9474	1	4
MIAMI	OUTPLANT	9.2	41.0526	2	9
MIAMI	OUTPLANT	8.2	22.1053	1	5
MIAMI	OUTPLANT	7.2	56.8421	1	13
MIAMI	OUTPLANT	9.8	91.5789	2	21
MIAMI	OUTPLANT	6.4	12.6316	1	3
MIAMI	OUTPLANT	7.2	50.5263	2	12
MIAMI	OUTPLANT	7.6	53.6842	2	13
MIAMI	OUTPLANT	11.3	15.7895	4	4
MIAMI	OUTPLANT	9.9	15.7895	2	4
MIAMI	OUTPLANT	11.2	60	1	16
MIAMI	OUTPLANT	8.6	25.2632	1	7
MIAMI	OUTPLANT	4.6	31.5789	1	9
MIAMI	OUTPLANT	6.3	37.8947	1	11
MIAMI	OUTPLANT	6	31.5789	1	10
MIAMI	OUTPLANT	5.2	6.31579	1	2
MIAMI	OUTPLANT	6.5	41.0526	1	13
MIAMI	OUTPLANT	6.6	9.47368	1	3
MIAMI	OUTPLANT	6.2	9.47368	1	3
MIAMI	OUTPLANT	15.6	9.47368	4	3
MIAMI	OUTPLANT	8.7	22.1053	2	8
MIAMI	OUTPLANT	9	18.9474	2	8
MIAMI	OUTPLANT	5.2	18.9474	1	8
MIAMI	OUTPLANT	7	15.7895	1	7
MIAMI	OUTPLANT	6.8	15.7895	1	7
MIAMI	OUTPLANT	6	12.6316	1	6
MIAMI	OUTPLANT	6.6	3.53684	1	2
MIAMI	OUTPLANT	6.3	16.4211	1	*
MIAMI	OUTPLANT	25.4	21.4737	4	*
MIAMI	OUTPLANT	12.9	17.6842	1	*
MIAMI	OUTPLANT	12.4	26.5263	2	*
MIAMI	OUTPLANT	11.3	29.0526	2	*
MIAMI	OUTPLANT	5.8	12	1	*
MIAMI	OUTPLANT	4.9	*	1	*
MIAMI	OUTPLANT	8.3	30.3158	2	*
MIAMI	OUTPLANT	15.3	*	2	*
MIAMI	OUTPLANT	12.3	22.1053	1	*
MIAMI	OUTPLANT	13.7	24	4	*
MIAMI	OUTPLANT	7.4	3.78947	1	*
MIAMI	OUTPLANT	11.2	*	2	*
MIAMI	OUTPLANT	5.4	*	1	*
MIAMI	OUTPLANT	6.6	18.3158	1	*
MIAMI	OUTPLANT	6	13.2632	1	*
MIAMI	OUTPLANT	8.9	7.57895	1	*
MIAMI	OUTPLANT	16.4	*	4	*
MIAMI	OUTPLANT	8.1	8.84211	1	*
MIAMI	NURSERY	3	111.6	1	12
MIAMI	NURSERY	2	62.4	1	7
MIAMI	NURSERY	4	118.2	2	14
MIAMI	NURSERY	4	105.6	1	13
MIAMI	NURSERY	5	100.8	1	13
MIAMI	NURSERY	4	76.8	1	10
MIAMI	NURSERY	9	94.2857	2	13
MIAMI	NURSERY	3	78	1	11
MIAMI	NURSERY	1	59.4	1	9
MIAMI	NURSERY	5.5	70.2857	1	12
MIAMI	NURSERY	4	58.2	1	10
MIAMI	NURSERY	5.3	22.55	1	4
MIAMI	NURSERY	5.5	26.4	1	5
MIAMI	NURSERY	8	87.4286	1	17
MIAMI	NURSERY	7.6	15.4	3	3
MIAMI	NURSERY	5.9	20.35	1	4
MIAMI	NURSERY	3	55.7143	1	11
MIAMI	NURSERY	5	60	1	12
MIAMI	NURSERY	3	63.4286	1	13
MIAMI	NURSERY	20	107.143	7	22
MIAMI	NURSERY	5.3	23.65	1	5
MIAMI	NURSERY	10	96	3	21
MIAMI	NURSERY	3	36	1	8
MIAMI	NURSERY	6	72.8571	2	17
MIAMI	NURSERY	8	4.28571	3	1
MIAMI	NURSERY	17	77.1429	6	20
MIAMI	NURSERY	5.5	72.8571	2	19
MIAMI	NURSERY	7	90	2	24
MIAMI	NURSERY	7	44.5714	2	12
MIAMI	NURSERY	5	66.8571	2	19
MIAMI	NURSERY	8	3.42857	3	1
MIAMI	NURSERY	8.2	9.35	3	3
MIAMI	NURSERY	5	14.5714	2	5
MIAMI	NURSERY	6.9	2.75	2	1
MIAMI	NURSERY	7	16.2857	2	6
MIAMI	NURSERY	4	18.8571	1	7
MIAMI	NURSERY	3	18.8571	1	7
MIAMI	NURSERY	8	18.8571	2	7
MIAMI	NURSERY	4	15.4286	1	6
MIAMI	NURSERY	8.5	15.4286	2	6
MIAMI	NURSERY	4	10.2857	1	5
MIAMI	NURSERY	8	1.28571	2	2
MIAMI	NURSERY	3	*	1
MIAMI	NURSERY	5.5	*	1	1
MIAMI	NURSERY	5.5	*	2	*
MIAMI	NURSERY	5	*	1	*
MIAMI	NURSERY	9.4	*	3	*
MIAMI	NURSERY	4	*	1	*
MIAMI	NURSERY	4.5	*	1	*
MIAMI	NURSERY	6.2	*	1	1
MIAMI	OUTPLANT	6.9	7	2	1
MIAMI	OUTPLANT	12.5	132	2	23
MIAMI	OUTPLANT	8	68	2	14
MIAMI	OUTPLANT	5	110	1	23
MIAMI	OUTPLANT	4.1	6.5	1	2
MIAMI	OUTPLANT	12	27	2	9
MIAMI	OUTPLANT	5.9	*	1	*
MIAMI	OUTPLANT	11.4	*	3	*
MIAMI	OUTPLANT	16.5	*	6	*
MIAMI	OUTPLANT	12.5	36	3	7
MIAMI	OUTPLANT	7.5	40	3	9
MIAMI	OUTPLANT	10.2	*	3	*
MIAMI	OUTPLANT	17	116	3	21
MIAMI	OUTPLANT	6	63	1	12
MIAMI	OUTPLANT	13	5	3	1
MIAMI	OUTPLANT	29	65	6	27
MIAMI	OUTPLANT	12	*	3	*
MIAMI	OUTPLANT	8.3	48.5	3	9
MIAMI	OUTPLANT	5.6	5	1	1
MIAMI	OUTPLANT	6.5	23	1	6
MIAMI	OUTPLANT	5.2	*	1
MIAMI	NURSERY	3	90.5455	1	11
MIAMI	NURSERY	9.7	56.7273	1	7
MIAMI	NURSERY	5.8	33.8182	1	5
MIAMI	NURSERY	7.4	37.0909	1	6
MIAMI	NURSERY	2.9	22.9091	1	4
MIAMI	NURSERY	1.5	5.45455	1	1
MIAMI	NURSERY	4	9.81818	1	2
MIAMI	NURSERY	4.3	19.0909	1	4
MIAMI	NURSERY	3.7	14.1818	1	3
MIAMI	NURSERY	5.3	27.2727	1	6
MIAMI	NURSERY	4.5	30.5455	1	7
MIAMI	NURSERY	3	7.63636	1	2
MIAMI	NURSERY	6.8	30.5455	2	8
MIAMI	NURSERY	1.7	7.63636	1	2
MIAMI	NURSERY	3.8	10.9091	1	3
MIAMI	NURSERY	4.8	10.9091	1	3
MIAMI	NURSERY	3.4	14.1818	1	4
MIAMI	NURSERY	4.7	28.3636	1	8
MIAMI	NURSERY	4	10.3636	1	3
MIAMI	NURSERY	1.8	8.72727	1	3
MIAMI	NURSERY	1.6	6.54545	1	3
MIAMI	NURSERY	1.4	6	1	3
MIAMI	NURSERY	*	*	*	*
MIAMI	NURSERY	3.7	*	1	*
MIAMI	NURSERY	5.3	*	1	*
MIAMI	NURSERY	1.7	*	1	*
MIAMI	NURSERY	2.4	*	1	*
DR	NURSERY	8.7	18
DR	NURSERY	8.5	18
DR	NURSERY	12.5	22
DR	NURSERY	9	21
DR	NURSERY	16	43.5
DR	NURSERY	14	51.5
DR	NURSERY	11.4	50
DR	NURSERY	9.4	52
DR	NURSERY	18.5	62
DR	NURSERY	19	65
DR	NURSERY	16.5	64.5
DR	NURSERY	25	75
DR	NURSERY	25.5	82
DR	NURSERY	27.8	85
DR	NURSERY	27.4	90
DR	NURSERY	18.2	85
DR	NURSERY	44	111
DR	NURSERY	22.7	101.5
DR	NURSERY	25	104
DR	NURSERY	35.4	121.5
DR	NURSERY	48.4	139
DR	NURSERY	32.3	125.5
DR	NURSERY	26	133
DR	NURSERY	32.5	141
DR	NURSERY	29.5	138
DR	NURSERY	37.9	146.5
DR	NURSERY	52.6	*
DR	NURSERY	13	43.5
DR	NURSERY	13	44.5
DR	NURSERY	16	49
DR	NURSERY	26	61
DR	NURSERY	17	62.5
DR	NURSERY	13	58.5
DR	NURSERY	12	72
DR	NURSERY	15	89
DR	NURSERY	29	112
DR	NURSERY	18	103
DR	NURSERY	14	106.5
DR	NURSERY	14	108
DR	NURSERY	32	128.5
DR	NURSERY	25	126
DR	NURSERY	12	159
DR	NURSERY	25	174
DR	NURSERY	24	179
DR	NURSERY	23	197
DR	NURSERY	25	204
DR	NURSERY	46.4	388
DR	NURSERY	81.3	439.5
DR	NURSERY	84.7	522
DR	NURSERY	76.3	574
DR	NURSERY	28.7	*
MIAMI	NURSERY	3	33.6	1	4
MIAMI	NURSERY	6	64.32	2	8
MIAMI	NURSERY	4	29.28	2	4
MIAMI	NURSERY	3	39.36	1	6
MIAMI	NURSERY	3.6	11.55	1	2
MIAMI	NURSERY	4	33.55	1	6
MIAMI	NURSERY	3	22	2	4
MIAMI	NURSERY	2	21.84	1	4
MIAMI	NURSERY	2	20.64	1	4
MIAMI	NURSERY	4	12.65	1	3
MIAMI	NURSERY	3.2	12.1	1	3
MIAMI	NURSERY	4.2	11.55	1	3
MIAMI	NURSERY	2.6	7.15	1	2
MIAMI	NURSERY	5	38.5714	2	11
MIAMI	NURSERY	6.5	45	2	14
MIAMI	NURSERY	2	18	1	8
MIAMI	NURSERY	3.8	8.8	1	4
MIAMI	NURSERY	8	3.85714	3	3
MIAMI	NURSERY	6	*	4
MIAMI	NURSERY	2	*	1	*
MIAMI	NURSERY	5.5	*	2	*
MIAMI	NURSERY	10.5	*	4	*
MIAMI	OUTPLANT	6.2	37	1	7
MIAMI	OUTPLANT	6.5	14	2	3
MIAMI	OUTPLANT	8.5	*	3	*
MIAMI	NURSERY	4.3	62.15	2	11
MIAMI	NURSERY	2.5	48.84	1	9
MIAMI	NURSERY	2	43.2	1	8
MIAMI	NURSERY	3	69.12	1	13
MIAMI	NURSERY	7.5	105.429	2	21
MIAMI	NURSERY	4.5	89.1429	2	20
MIAMI	NURSERY	7.5	158.571	3	39
MIAMI	NURSERY	3.1	19.8	1	5
MIAMI	NURSERY	3	38.52	1	10
MIAMI	NURSERY	3.7	26.4	1	7
MIAMI	NURSERY	3.8	22.55	1	6
MIAMI	NURSERY	3.5	30	2	8
MIAMI	NURSERY	2	54.8571	1	15
MIAMI	NURSERY	3	38.5714	1	11
MIAMI	NURSERY	2.5	23.1429	1	8
MIAMI	NURSERY	4	2.75	1	1
MIAMI	NURSERY	2.5	24	1	9
MIAMI	NURSERY	3	1.71429	1	2
MIAMI	NURSERY	3.7	*	1	*
MIAMI	NURSERY	6	*	3	*
MIAMI	OUTPLANT	8.6	142	1	36
MIAMI	OUTPLANT	9.4	134	2	38
MIAMI	OUTPLANT	9.6	74	2	22
MIAMI	OUTPLANT	4	22	1	8
MIAMI	OUTPLANT	11.9	9	5	4
MIAMI	OUTPLANT	5.1	11	1	2
MIAMI	OUTPLANT	9.5	14.5	2	3
MIAMI	OUTPLANT	4	13	1	4
MIAMI	OUTPLANT	5	12	1	4
MIAMI	OUTPLANT	4.3	6	1	3
MIAMI	OUTPLANT	5	84.5	2	13
MIAMI	OUTPLANT	7	49	2	9
MIAMI	OUTPLANT	6	50	2	10
MIAMI	OUTPLANT	9	*	3
MIAMI	NURSERY	5	86.4	1	12
MIAMI	NURSERY	7	106.8	2	15
MIAMI	NURSERY	2	70.8	1	11
MIAMI	NURSERY	6	50.6	1	8
MIAMI	NURSERY	9	78.1	2	13
MIAMI	NURSERY	13.5	120	3	20
MIAMI	NURSERY	3	46.8	1	8
MIAMI	NURSERY	4	91.2	1	16
MIAMI	NURSERY	13	102.3	2	18
MIAMI	NURSERY	4.5	45.4286	1	8
MIAMI	NURSERY	19	93.4286	7	17
MIAMI	NURSERY	1	37.2	1	7
MIAMI	NURSERY	4	37.2	1	7
MIAMI	NURSERY	3.5	57.4286	1	11
MIAMI	NURSERY	8	44	1	9
MIAMI	NURSERY	3	45.4286	1	10
MIAMI	NURSERY	2.5	49.7143	1	11
MIAMI	NURSERY	2	26.5714	1	6
MIAMI	NURSERY	5.5	44	1	10
MIAMI	NURSERY	2.5	38.5714	1	9
MIAMI	NURSERY	6	49.7143	1	12
MIAMI	NURSERY	3	43.7143	1	11
MIAMI	NURSERY	13.5	79.7143	4	21
MIAMI	NURSERY	6	58.2857	3	16
MIAMI	NURSERY	11.5	81.4286	3	23
MIAMI	NURSERY	4	30.8571	2	9
MIAMI	NURSERY	3	41.1429	2	12
MIAMI	NURSERY	2	20.5714	1	6
MIAMI	NURSERY	8.5	33	2	10
MIAMI	NURSERY	2.5	36	1	11
MIAMI	NURSERY	2.5	35.1429	2	11
MIAMI	NURSERY	3	41.1429	1	13
MIAMI	NURSERY	4.5	18.8571	1	6
MIAMI	NURSERY	4	33.6	1	11
MIAMI	NURSERY	3	30	1	10
MIAMI	NURSERY	3.5	36	2	12
MIAMI	NURSERY	6	2.2	1	1
MIAMI	NURSERY	6	*	1	*
MIAMI	NURSERY	6	*	1	*
MIAMI	NURSERY	3	*	1	*
MIAMI	NURSERY	2	*	1	*
MIAMI	NURSERY	4	*	2	*
MIAMI	NURSERY	4	*	2	*
MIAMI	NURSERY	3.5	*	1	*
MIAMI	NURSERY	6	*	1	1
MIAMI	OUTPLANT	5.7	26	1	7
MIAMI	OUTPLANT	10.5	16	2	6
MIAMI	OUTPLANT	*	8		3
MIAMI	OUTPLANT	10	*	2	3
MIAMI	OUTPLANT	14.5	104	3	18
MIAMI	OUTPLANT	13	58	5	11
MIAMI	OUTPLANT	8	41.5	2	8
MIAMI	OUTPLANT	12.5	59	4	12
MIAMI	OUTPLANT	7	68	2	14
MIAMI	OUTPLANT	10	38.5	2	7
MIAMI	OUTPLANT	12	28	2	7
MIAMI	OUTPLANT	13	*	3	*
MIAMI	OUTPLANT	7	*	1
MIAMI	OUTPLANT	14	*	3
MIAMI	OUTPLANT	14.6	68	4	12
MIAMI	OUTPLANT	7.4	11	2	2
MIAMI	OUTPLANT	5.3	56	1	11
MIAMI	OUTPLANT	5	33	1	7
MIAMI	OUTPLANT	6	90	1	21
MIAMI	OUTPLANT	5.4	90	1	23
MIAMI	OUTPLANT	8	37	2	10
DR	NURSERY	35	19
DR	NURSERY	33.5	22
DR	NURSERY	22	25
DR	NURSERY	48.5	53
DR	NURSERY	8.7	18
DR	NURSERY	12.5	22
DR	NURSERY	8.5	18
DR	NURSERY	12.1	23
DR	NURSERY	50	62
DR	NURSERY	9	21
DR	NURSERY	18.5	31
DR	NURSERY	9.5	25
DR	NURSERY	13	29.5
DR	NURSERY	49.5	72.6667
DR	NURSERY	28	52
DR	NURSERY	7.9	32.5
DR	NURSERY	27	52
DR	NURSERY	21	47.5
DR	NURSERY	16	43.5
DR	NURSERY	12	40
DR	NURSERY	15.5	45.08
DR	NURSERY	48	78
DR	NURSERY	13	43.5
DR	NURSERY	10.5	42
DR	NURSERY	13	44.5
DR	NURSERY	31	63
DR	NURSERY	16	49
DR	NURSERY	172	205
DR	NURSERY	17.7	51
DR	NURSERY	13.5	46.8
DR	NURSERY	19.7	54
DR	NURSERY	26	61
DR	NURSERY	15.5	51
DR	NURSERY	35	71
DR	NURSERY	8	44
DR	NURSERY	7.5	44
DR	NURSERY	14	51.5
DR	NURSERY	11.4	50
DR	NURSERY	20.5	60.72
DR	NURSERY	20	61
DR	NURSERY	9.4	52
DR	NURSERY	47	90
DR	NURSERY	18.5	62
DR	NURSERY	17	62.5
DR	NURSERY	13	58.5
DR	NURSERY	19	65
DR	NURSERY	30	76
DR	NURSERY	6	52.2
DR	NURSERY	13	60.26
DR	NURSERY	41.5	89.3333
DR	NURSERY	21	69
DR	NURSERY	16.5	64.5
DR	NURSERY	7.5	56.12
DR	NURSERY	42	91.3333
DR	NURSERY	25	75
DR	NURSERY	11.5	62
DR	NURSERY	22	73
DR	NURSERY	9.5	60.75
DR	NURSERY	19	71.1
DR	NURSERY	75.5	130
DR	NURSERY	12	67
DR	NURSERY	25.5	82
DR	NURSERY	14	71.3
DR	NURSERY	17.5	75
DR	NURSERY	19	78.6667
DR	NURSERY	12	72
DR	NURSERY	11.5	72
DR	NURSERY	9	70
DR	NURSERY	12.5	74
DR	NURSERY	32	93.6
DR	NURSERY	18.2	85
DR	NURSERY	44	111
DR	NURSERY	74	141
DR	NURSERY	25.5	97
DR	NURSERY	21	94
DR	NURSERY	15	89
DR	NURSERY	36.5	111.32
DR	NURSERY	15	90.9
DR	NURSERY	23	100.667
DR	NURSERY	11.2	89
DR	NURSERY	25	104
DR	NURSERY	36	116.667
DR	NURSERY	19	100
DR	NURSERY	6.5	89
DR	NURSERY	29	112
DR	NURSERY	18	103
DR	NURSERY	12	98
DR	NURSERY	38	125.12
DR	NURSERY	55.5	143
DR	NURSERY	28	117
DR	NURSERY	45	134.5
DR	NURSERY	39.5	130
DR	NURSERY	48.4	139
DR	NURSERY	48	139
DR	NURSERY	14	106.5
DR	NURSERY	14	108
DR	NURSERY	22	116.5
DR	NURSERY	54	149
DR	NURSERY	56	152
DR	NURSERY	32	128.5
DR	NURSERY	7.5	104.5
DR	NURSERY	43.5	144
DR	NURSERY	23	124
DR	NURSERY	25	126
DR	NURSERY	16.5	118
DR	NURSERY	50.5	152
DR	NURSERY	33.5	136
DR	NURSERY	103.5	207.333
DR	NURSERY	9	113.333
DR	NURSERY	12.5	117
DR	NURSERY	39	144
DR	NURSERY	28.5	135
DR	NURSERY	13	120
DR	NURSERY	26	133
DR	NURSERY	29.5	138
DR	NURSERY	18	126.5
DR	NURSERY	32.5	141
DR	NURSERY	17.5	127.333
DR	NURSERY	11.2	125
DR	NURSERY	35	151
DR	NURSERY	45	165
DR	NURSERY	39	161
DR	NURSERY	44	169
DR	NURSERY	20	150.88
DR	NURSERY	86	218
DR	NURSERY	75	212
DR	NURSERY	32.5	170
DR	NURSERY	30	168.5
DR	NURSERY	21.5	162
DR	NURSERY	52	193
DR	NURSERY	101.5	246
DR	NURSERY	69	215
DR	NURSERY	12	159
DR	NURSERY	27.5	175
DR	NURSERY	25	174
DR	NURSERY	24.5	179
DR	NURSERY	24	179
DR	NURSERY	44	205
DR	NURSERY	41	209.5
DR	NURSERY	46	214.667
DR	NURSERY	79.5	249
DR	NURSERY	42	213
DR	NURSERY	108	280
DR	NURSERY	23	197
DR	NURSERY	25	204
DR	NURSERY	45	238
DR	NURSERY	19	236
DR	NURSERY	96.5	323
DR	NURSERY	56	289
DR	NURSERY	77	320
DR	NURSERY	56	305
DR	NURSERY	72	326
DR	NURSERY	46.5	312
DR	NURSERY	37	349.5
DR	NURSERY	82.5	430
DR	NURSERY	164	877
DR	NURSERY	39	*
DR	NURSERY	20	*
DR	NURSERY	47.5	*
DR	NURSERY	33.5	*
DR	NURSERY	35	*
DR	NURSERY	73	*
DR	NURSERY	11	*
DR	NURSERY	50	*
DR	NURSERY	29.5	*
DR	NURSERY	19	*
DR	NURSERY	54	*
DR	NURSERY	31.5	*
DR	NURSERY	63.5	*
DR	NURSERY	61	*
DR	NURSERY	67	*
DR	NURSERY	26	*
DR	NURSERY	33.5	*
DR	NURSERY	60	*
DR	NURSERY	23	*
DR	OUTPLANT	*	16.2857		2
DR	OUTPLANT	8	7.71429	2	1
DR	OUTPLANT	16	46	1.5	6
DR	OUTPLANT	*	37.7143		5
DR	OUTPLANT	*	29.1429		4
DR	OUTPLANT	11	80	1.2	11
DR	OUTPLANT	26.6	72	2	10
DR	OUTPLANT	24	85	1.7	12
DR	OUTPLANT	*	6.85714		1
DR	OUTPLANT	23	52	2.5	8
DR	OUTPLANT	21	12.8571	3	2
DR	OUTPLANT	*	12		2
DR	OUTPLANT	6	6	1	1
DR	OUTPLANT	5	12	1	2
DR	OUTPLANT	18.5	12	3	2
DR	OUTPLANT	11	120	3	20
DR	OUTPLANT	*	12		2
DR	OUTPLANT	13	6	2	1
DR	OUTPLANT	*	47.1429		8
DR	OUTPLANT	18	104.571	5	18
DR	OUTPLANT	16	51.4286	3	9
DR	OUTPLANT	7	17.1429	2	3
DR	OUTPLANT	26	74	2.1	13
DR	OUTPLANT	*	45.4286		8
DR	OUTPLANT	13.5	107	1.3	19
DR	OUTPLANT	23.5	73	2.1	13
DR	OUTPLANT	24	5.57143	4	1
DR	OUTPLANT	6	44.5714	1	8
DR	OUTPLANT	18	109.714	4	20
DR	OUTPLANT	19	87.4286	6	16
DR	OUTPLANT	10	16.2857	1	3
DR	OUTPLANT	27	108	2.1	20
DR	OUTPLANT	7	37.7143	1	7
DR	OUTPLANT	*	21.4286		4
DR	OUTPLANT	9	10.7143	1	2
DR	OUTPLANT	8	90.8571	2	17
DR	OUTPLANT	7	42.4286	1	8
DR	OUTPLANT	6.5	31.7143	1	6
DR	OUTPLANT	24	79	1.2	15
DR	OUTPLANT	5	52.2857	2	10
DR	OUTPLANT	8	31.2857	1	6
DR	OUTPLANT	16.5	15.4286	3	3
DR	OUTPLANT	8	51.4286	1	10
DR	OUTPLANT	*	25.7143		5
DR	OUTPLANT	6	25.7143	1	5
DR	OUTPLANT	7.5	5.14286	2	1
DR	OUTPLANT	19.5	51	1.8	10
DR	OUTPLANT	16	85.7143	3	17
DR	OUTPLANT	15	95.1429	4	19
DR	OUTPLANT	10	80	1.2	16
DR	OUTPLANT	12	30	1	6
DR	OUTPLANT	21	24.8571	3	5
DR	OUTPLANT	13	34.7143	4	7
DR	OUTPLANT	13	34.2857	4	7
DR	OUTPLANT	12.5	72.8571	2	15
DR	OUTPLANT	17	29.1429	4	6
DR	OUTPLANT	9	38.5714	2	8
DR	OUTPLANT	12	72	4	15
DR	OUTPLANT	16	76.2857	3	16
DR	OUTPLANT	13	61.7143	3	13
DR	OUTPLANT	51	71	2.1	15
DR	OUTPLANT	4	18.8571	1	4
DR	OUTPLANT	8	28.2857	1	6
DR	OUTPLANT	11	9.42857	2	2
DR	OUTPLANT	15.5	56.5714	4	12
DR	OUTPLANT	21	37.7143	4	8
DR	OUTPLANT	14	28.2857	2	6
DR	OUTPLANT	17	89.1429	5	19
DR	OUTPLANT	16	107.143	1	23
DR	OUTPLANT	*	23.1429		5
DR	OUTPLANT	15	36.8571	3	8
DR	OUTPLANT	7	50.5714	1	11
DR	OUTPLANT	29	275.143	4	60
DR	OUTPLANT	21	146.571	4	32
DR	OUTPLANT	9	36.4286	2	8
DR	OUTPLANT	15	49.7143	3	11
DR	OUTPLANT	30	102.857	4	23
DR	OUTPLANT	18.5	66.8571	1	15
DR	OUTPLANT	19.5	22.2857	2	5
DR	OUTPLANT	10.5	44.5714	2	10
DR	OUTPLANT	22	13.2857	3	3
DR	OUTPLANT	9	92.5714	1	21
DR	OUTPLANT	20	70.2857	7	16
DR	OUTPLANT	34	73.7143	7	17
DR	OUTPLANT	10	42.8571	2	10
DR	OUTPLANT	23.5	12.8571	4	3
DR	OUTPLANT	17	135.429	2	32
DR	OUTPLANT	6	33.4286	1	8
DR	OUTPLANT	8	29.1429	1	7
DR	OUTPLANT	8	12.4286	1	3
DR	OUTPLANT	*	20.5714		5
DR	OUTPLANT	17.5	48.8571	3	12
DR	OUTPLANT	18	84.8571	3	21
DR	OUTPLANT	12	28.2857	1	7
DR	OUTPLANT	21	28.2857	5	7
DR	OUTPLANT	29	116.571	6	29
DR	OUTPLANT	15	148.286	2	37
DR	OUTPLANT	*	24		6
DR	OUTPLANT	9.5	12	1	3
DR	OUTPLANT	8	48	1	12
DR	OUTPLANT	12	48	3	12
DR	OUTPLANT	16	12	3	3
DR	OUTPLANT	14	31.7143	1	8
DR	OUTPLANT	21	63.4286	5	16
DR	OUTPLANT	24.5	109.714	4	28
DR	OUTPLANT	21	27.4286	5	7
DR	OUTPLANT	16	31.2857	3	8
DR	OUTPLANT	8	11.5714	1	3
DR	OUTPLANT	9	7.71429	1	2
DR	OUTPLANT	7	30.8571	1	8
DR	OUTPLANT	10	46.2857	2	12
DR	OUTPLANT	6	15.4286	1	4
DR	OUTPLANT	15	23.1429	2	6
DR	OUTPLANT	10	46.2857	2	12
DR	OUTPLANT	10.5	7.71429	2	2
DR	OUTPLANT	10	15.4286	3	4
DR	OUTPLANT	14	30.8571	3	8
DR	OUTPLANT	14.5	15.4286	3	4
DR	OUTPLANT	*	19.2857		5
DR	OUTPLANT	9.5	23	1.5	6
DR	OUTPLANT	8.2	23	1.3	6
DR	OUTPLANT	12	26.5714	1	7
DR	OUTPLANT	28	41.1429	5	11
DR	OUTPLANT	14	11.1429	4	3
DR	OUTPLANT	11.5	14.5714	2	4
DR	OUTPLANT	13	18	4	5
DR	OUTPLANT	23	35.5714	5	10
DR	OUTPLANT	27	28.2857	5	8
DR	OUTPLANT	12.5	80.5714	3	23
DR	OUTPLANT	16	30.8571	2	9
DR	OUTPLANT	6	3.42857	1	1
DR	OUTPLANT	6.5	13.7143	1	4
DR	OUTPLANT	13	37.7143	3	11
DR	OUTPLANT	13	40.2857	3	12
DR	OUTPLANT	21	53.1429	4	16
DR	OUTPLANT	6	49.7143	2	15
DR	OUTPLANT	19.5	36	3	11
DR	OUTPLANT	18.5	32.5714	2	10
DR	OUTPLANT	11	29.1429	1	9
DR	OUTPLANT	6	35.5714	1	11
DR	OUTPLANT	19.5	38.5714	4	12
DR	OUTPLANT	*	6.42857		2
DR	OUTPLANT	10	31.7143	1	10
DR	OUTPLANT	23	50.5714	5	16
DR	OUTPLANT	8	9.42857	1	3
DR	OUTPLANT	10	9.42857	1	3
DR	OUTPLANT	30	24.8571	6	8
DR	OUTPLANT	22.5	66	4	22
DR	OUTPLANT	10	12	2	4
DR	OUTPLANT	6.5	6	1	2
DR	OUTPLANT	6.5	14.5714	1	5
DR	OUTPLANT	*	8.57143		3
DR	OUTPLANT	5	25.2857	1	9
DR	OUTPLANT	7	30.8571	1	11
DR	OUTPLANT	5	16.2857	1	6
DR	OUTPLANT	13	18.8571	2	7
DR	OUTPLANT	11	21.4286	2	8
DR	OUTPLANT	8.5	18	1	7
DR	OUTPLANT	14.5	27.4286	3	11
[truncated: 170 more rows]
